# Supplementary material
Source: ML conference proceedings conference paper supplement (https://openaccess.thecvf.com/content/CVPR2022/html/Gupta_Towards_General_Purpose_CVPR_2022_paper.html)

Towards General Purpose Vision Systems:  
An End-to-End Task-Agnostic Vision-Language Architecture  
Paper ID 4901

Qualitative results for GPV-I

10 randomly sampled images from the COCO-val dataset, with all associated data points across various tasks. Images sorted in decreasing order of average correctness.

This GPV-I model was trained on the original COCO-train dataset (not COCO-SCE).

Color coding: **Correct**, **Incorrect** (with correct answer beneath it), **Partially correct** (with correct/closest answer beneath it), Unsupervised text output.

Is the dog running? **No**

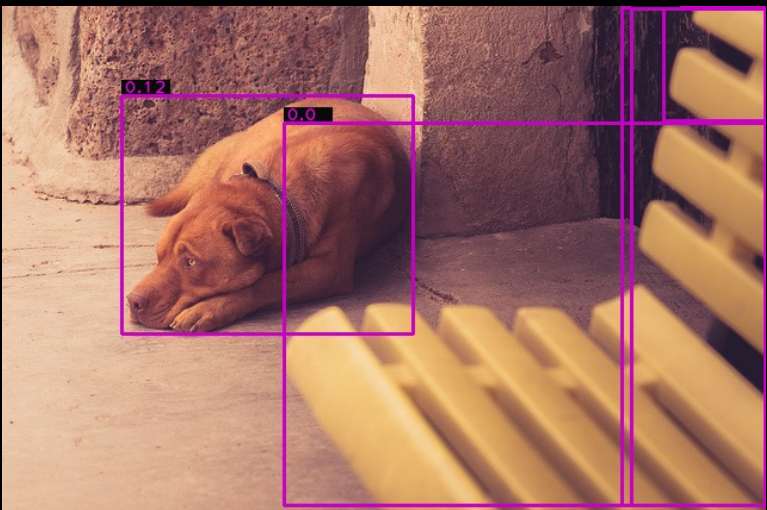

Does this dog have an owner? **Yes**

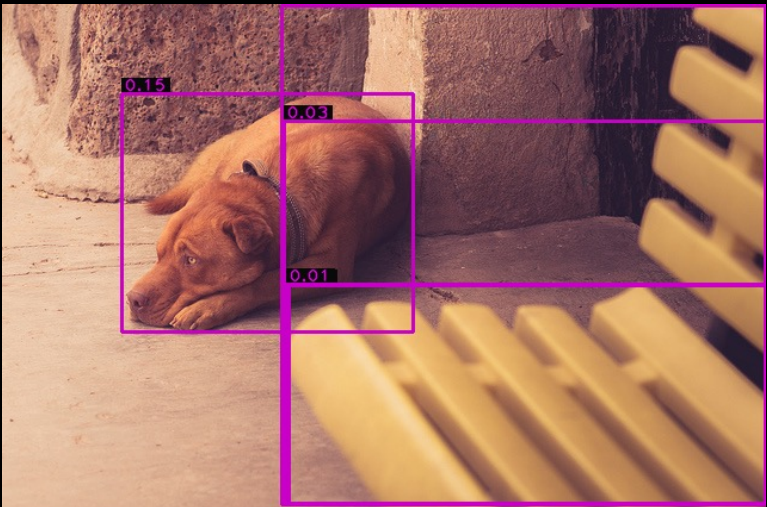

Is the dog comfortable? **Yes**

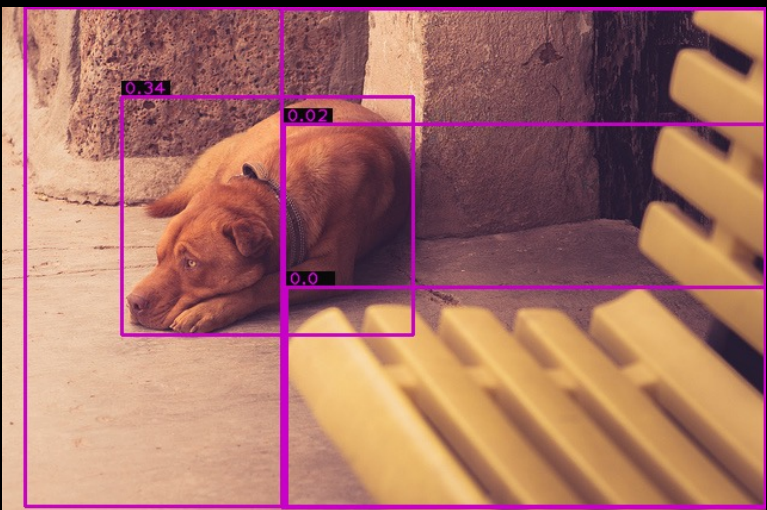

What is going on in this image.

**A dog laying on a wooden floor next to a wooden bench.**  
(A large brown dog laying on the floor next to a wooden bench.)

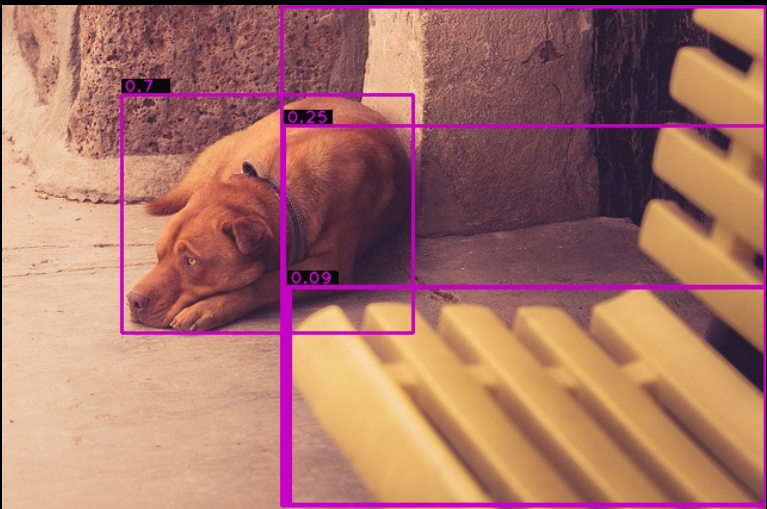

What is going on in the image.

**A dog laying on a bench next to a yellow wall.**  
(A large brown dog laying on the floor next to a wooden bench.)

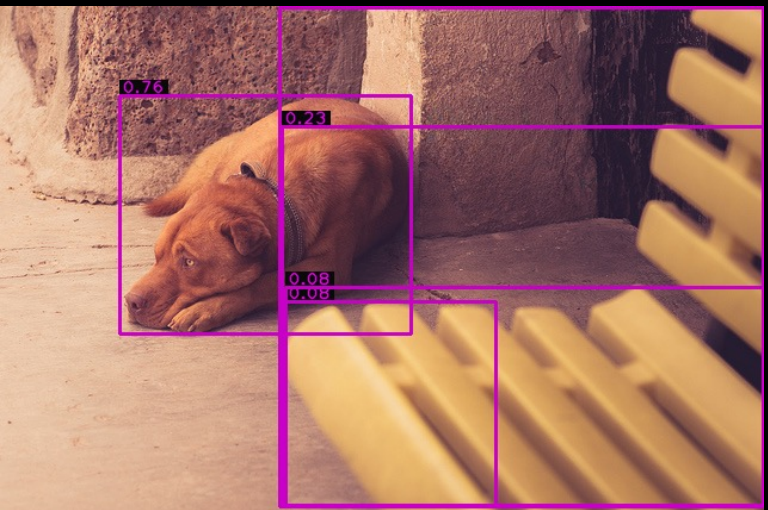

Caption the image.

**A dog laying on the ground next to a bench.**

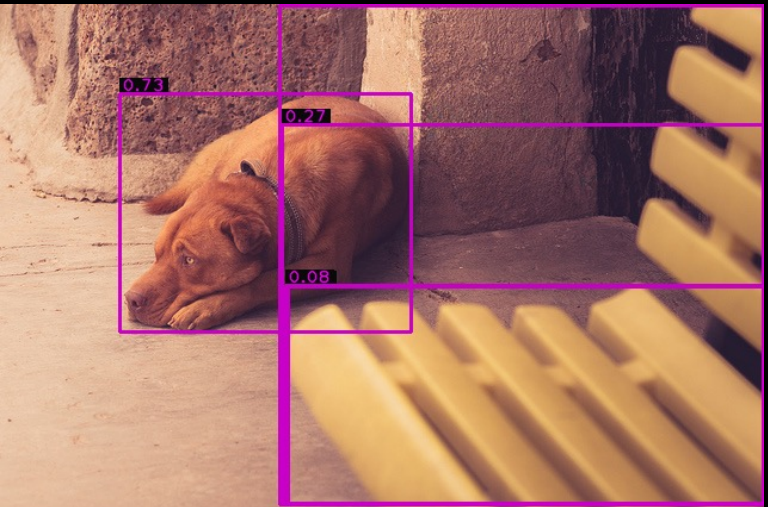

Find all instances of dog in this image.

**Lab**

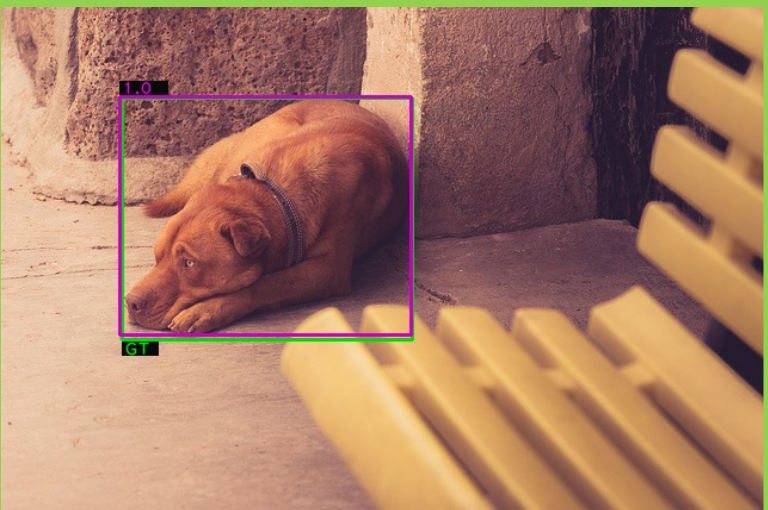

Find instances of bench in the image.

**\_\_unk\_\_**

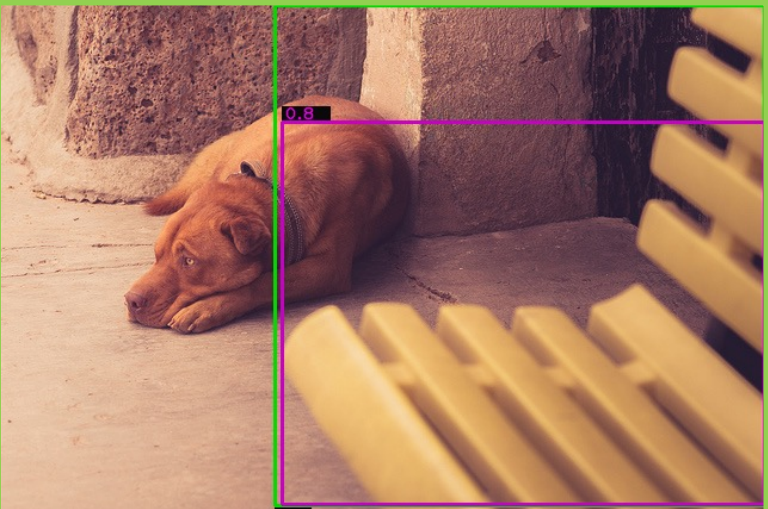



What object is this?

*Dog*

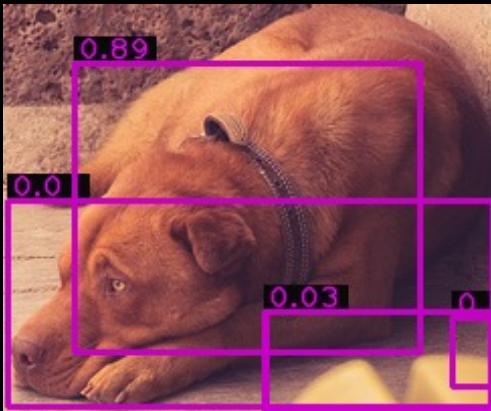

What object is this?

*Bench*

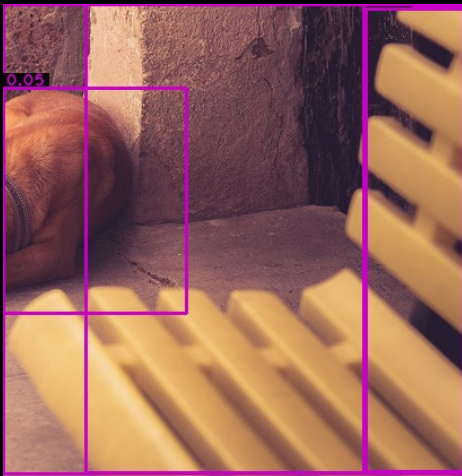



What color is the surfboard?

Blue

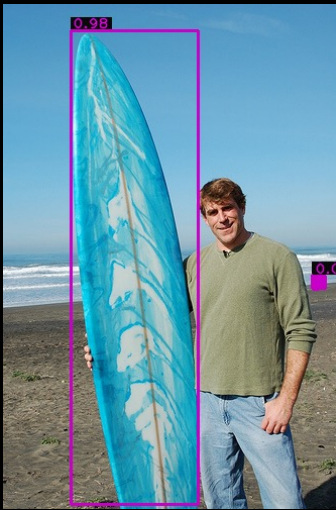

Generate a caption.

A man standing on a beach holding a surfboard.

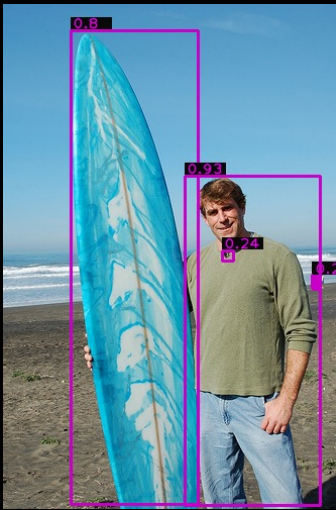

Is the man on the surfboard or next to it?

Behind  
(Next to it)

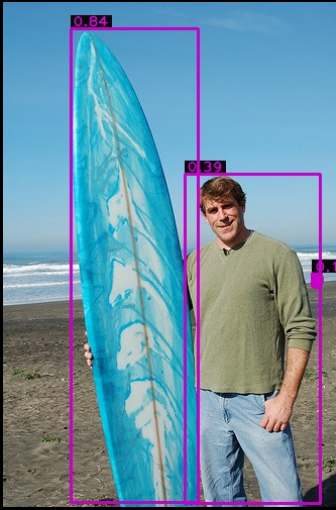

Locate all instances of person in this image.

Man standing on beach with surfboard

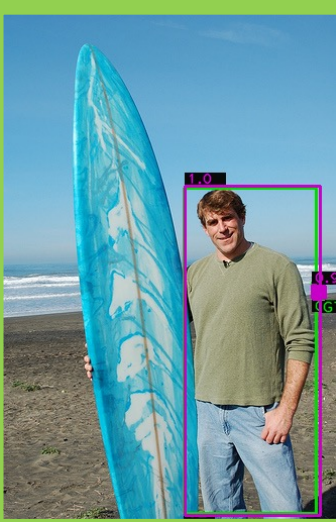

Is the man wearing the right clothes to go surfing?

No

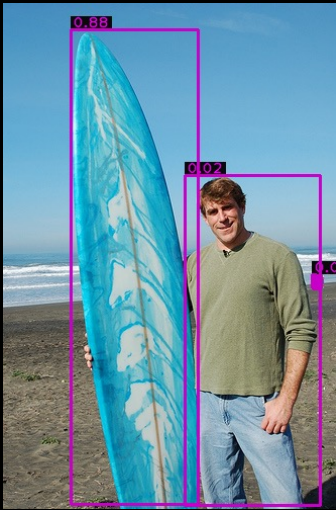

Locate surfboard in the image.

blue and white  
\_\_unk\_\_

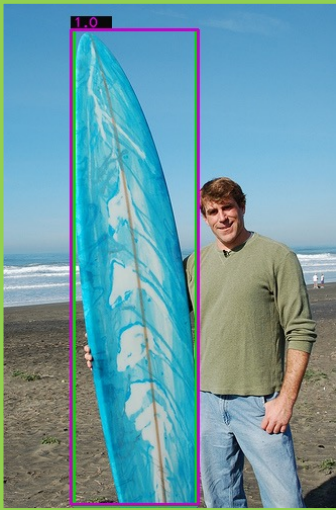

Is the man dressed appropriately?

Yes: 2 votes  
(No: 8 votes)

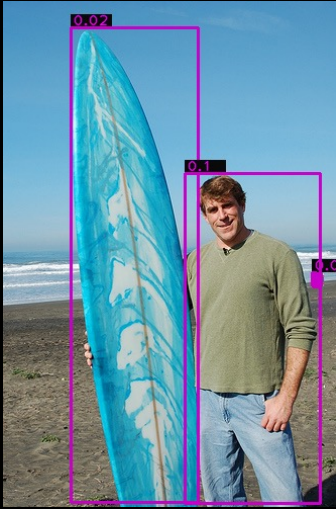

What is this?

Person

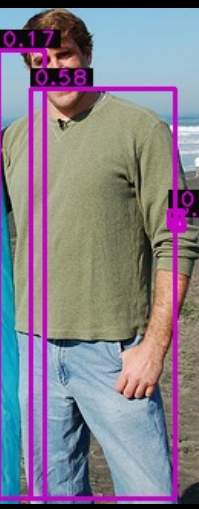

What is this?

*Surfboard*

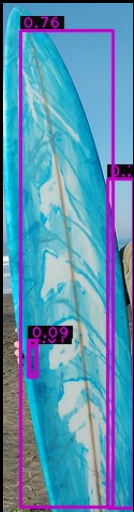



Where are the cars parked?

*Street: 1 vote*  
*(On street: 2 votes)*

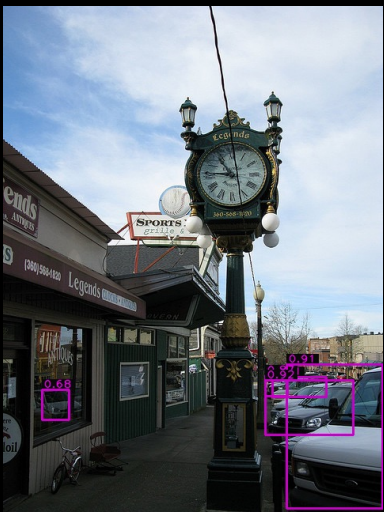

Find all instances of chair.

*A man is standing in front of a building*

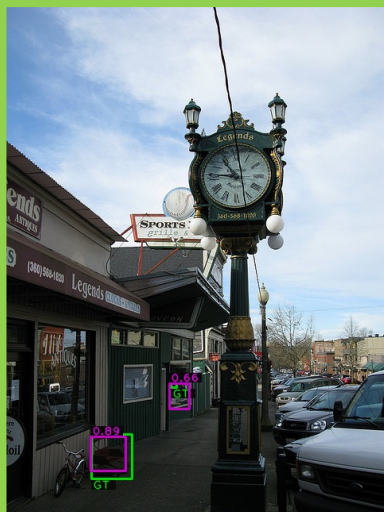

What time is it?

unk  
*(10:45)*

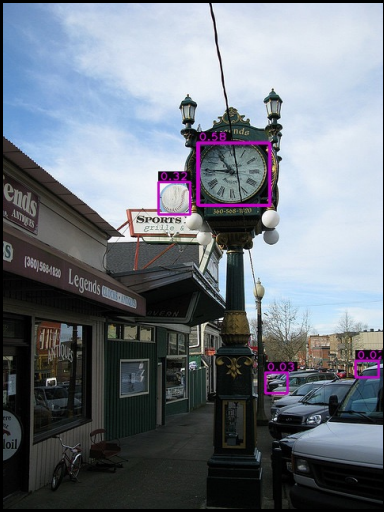

Find all instances of car in the image.

*Many people are standing outside of a building*

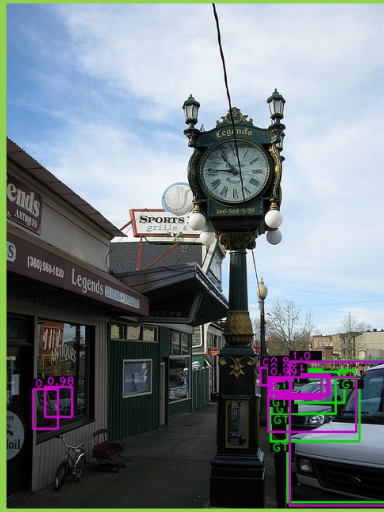

Where is the clock?

*On pole: 1 vote*  
*(On sidewalk: 3 votes)*

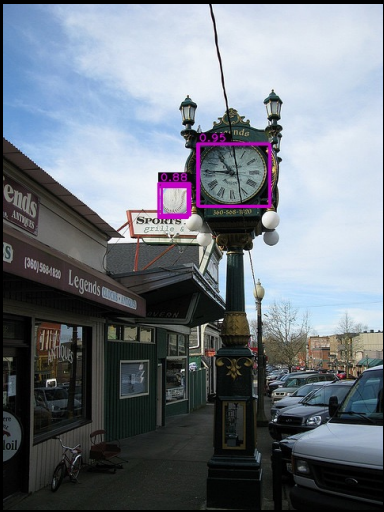

Find bicycle in this image.

*1 way*

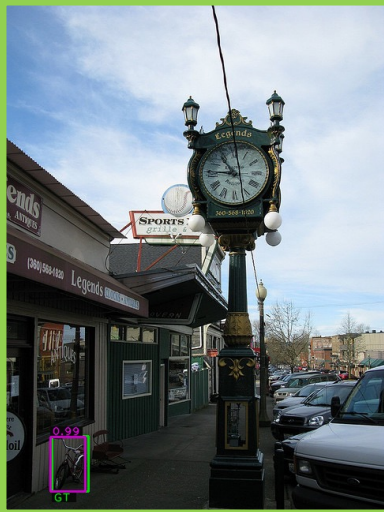

Caption the image.

*A clock on a pole on a street.*

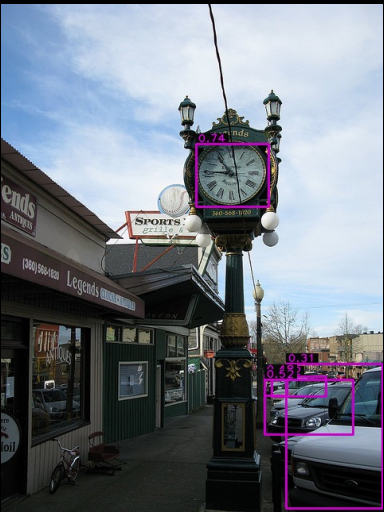

Locate all instances of clock in this image.

*Clock tower*

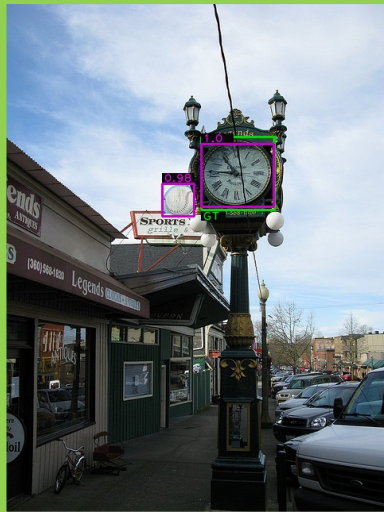



What is this object?

*Chair*

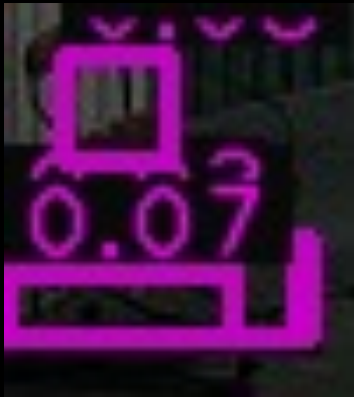

What object is this?

*Car*

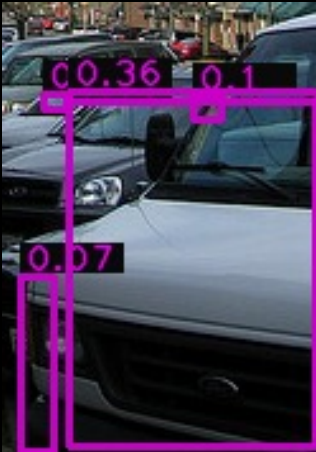

What is this thing?

*Bicycle*

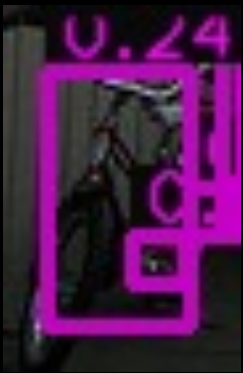

What is this thing?

*Clock*

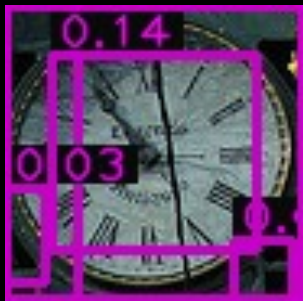

Who many vehicles  
are covered in  
snow?

3: 1 vote  
(10: 3 votes)

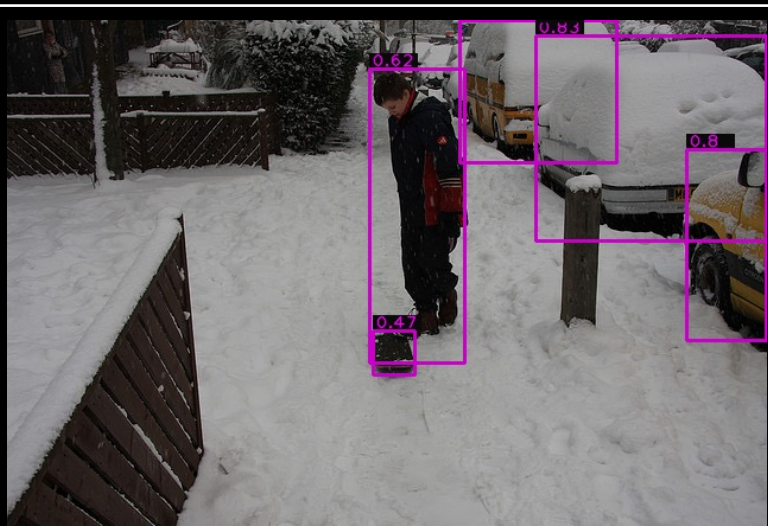

What is happening  
in this image.

A person on a  
snowboard on a snowy  
street.

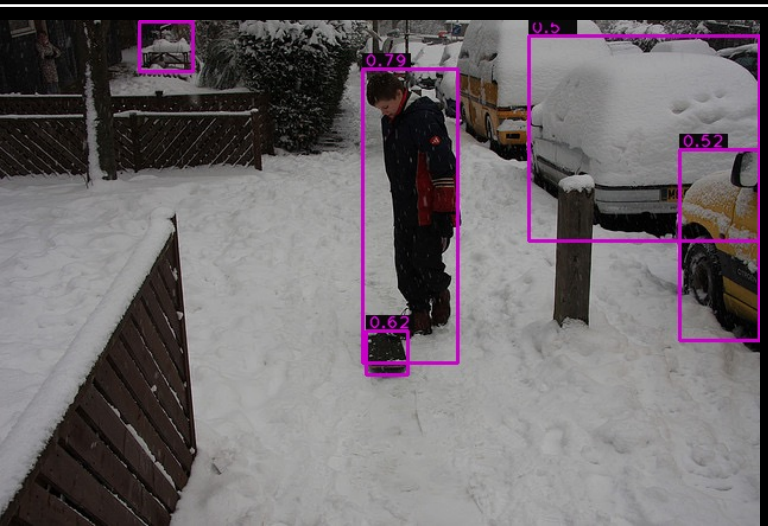

What color is the  
snow?

White

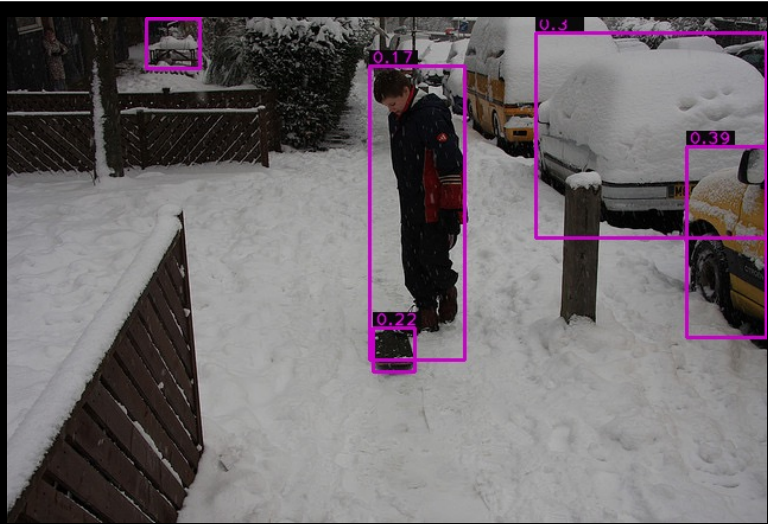

Locate instances of  
car.

White \_\_unk\_\_ and red

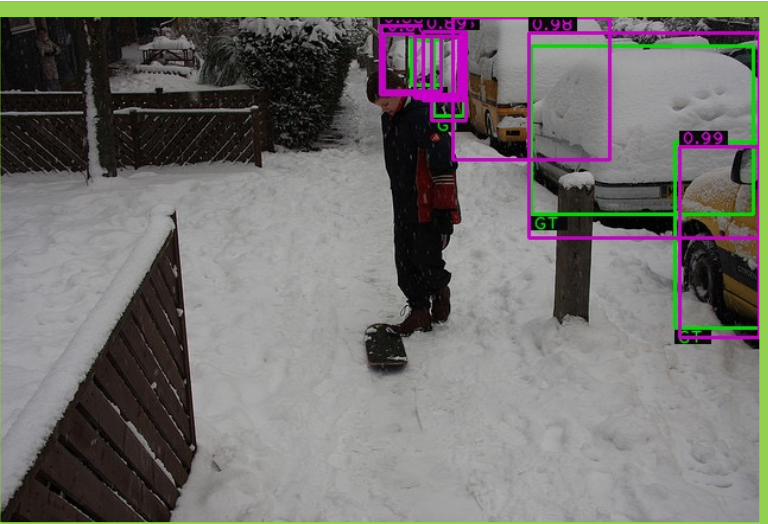

What covers the car?

Snow

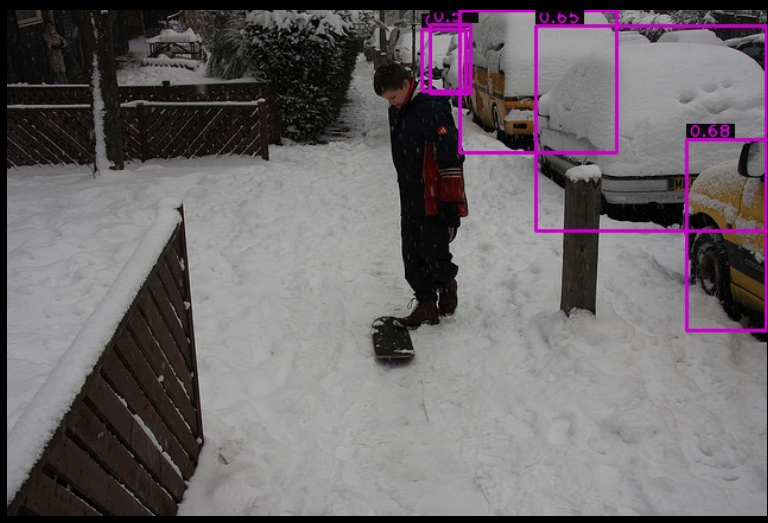

Find person in the  
image.

A person riding a  
snowboard on a snowy  
ground

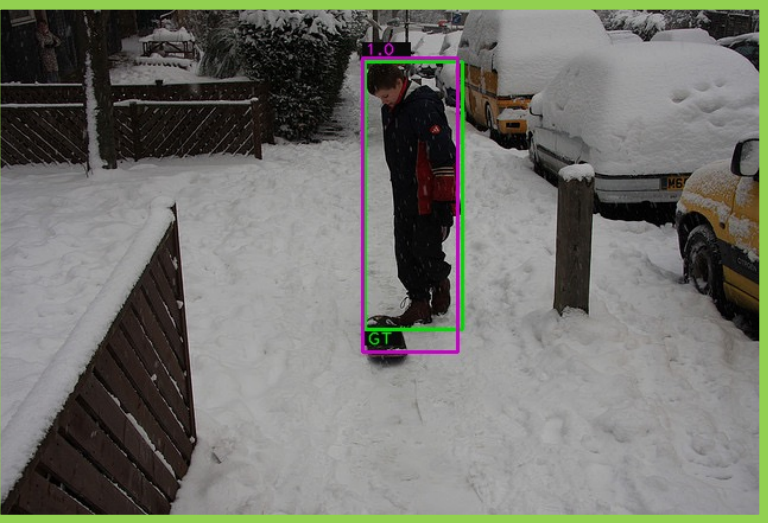

Is the boy trying to  
skateboard in the  
snow?

Yes

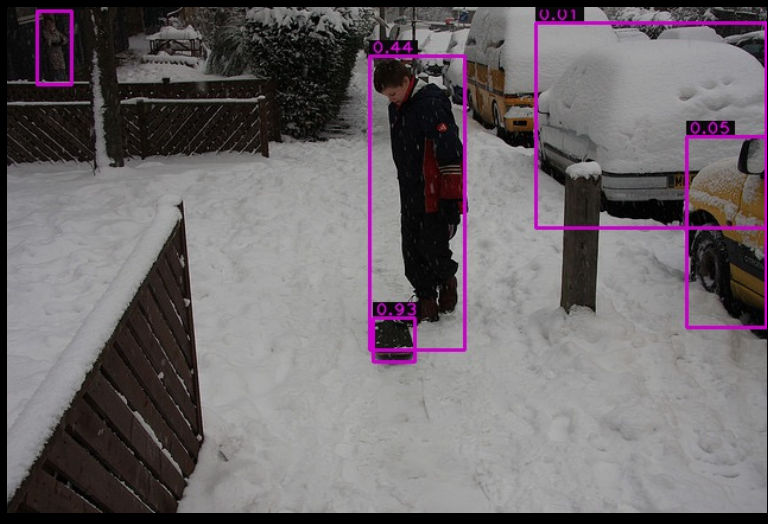

Find all instances of  
snowboard.

Man's head

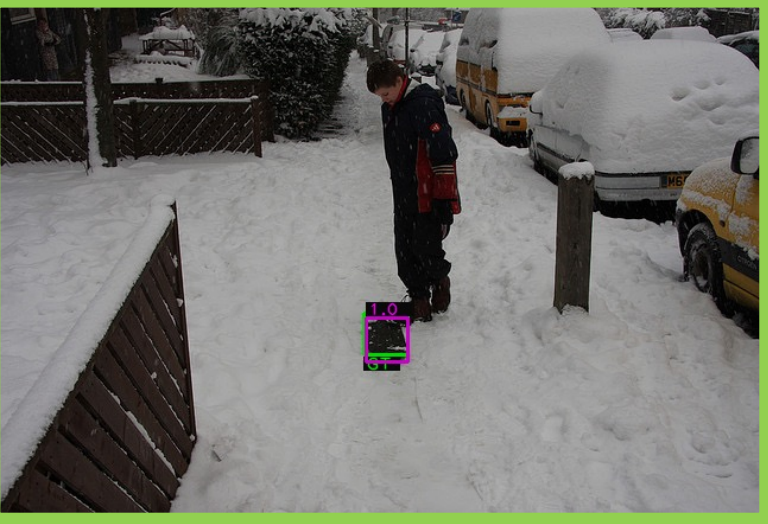



Locate truck

*A person on a snowboard in the snow*

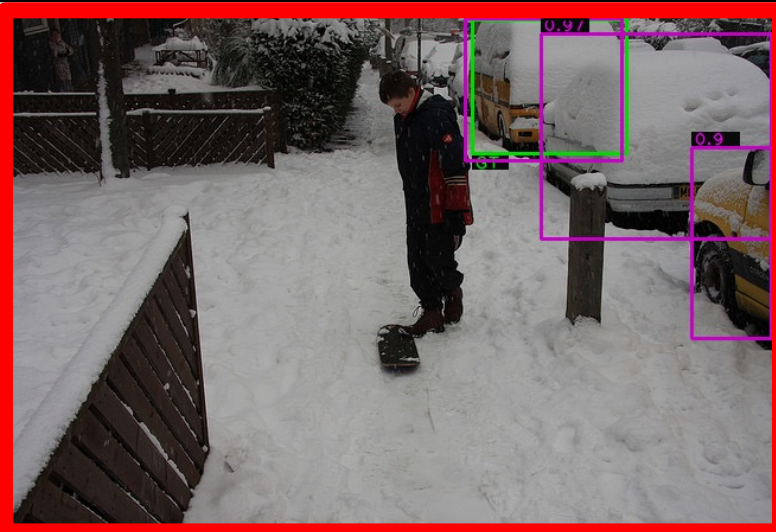

What is this thing?

*Car*  
*(Truck)*

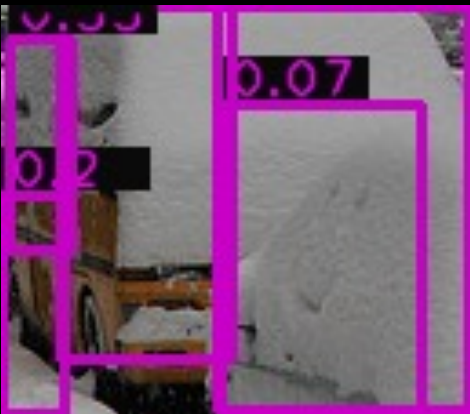

What is this?

*Car*

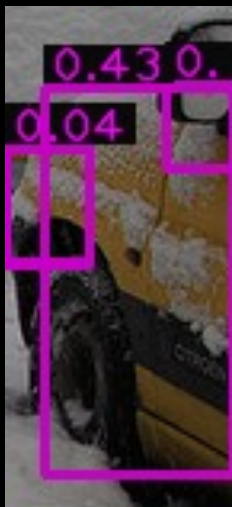

What is this?

*Person*

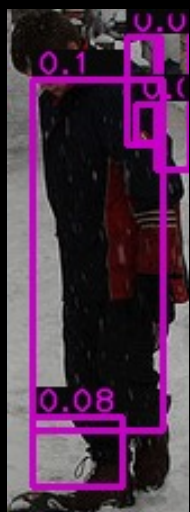

What is this?

*Snowboard*

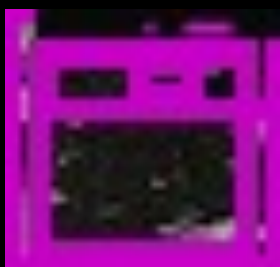



Where is the plane?

*In sky*  
*(In air)*

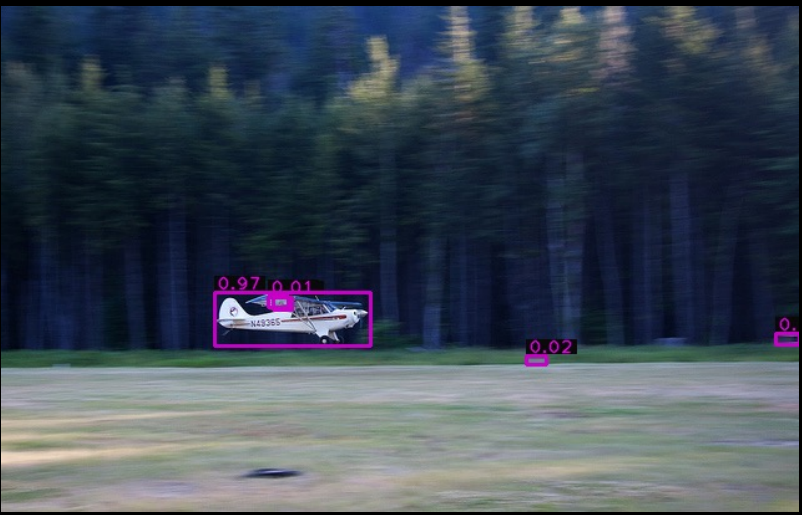

Is the plane moving?

*Yes*

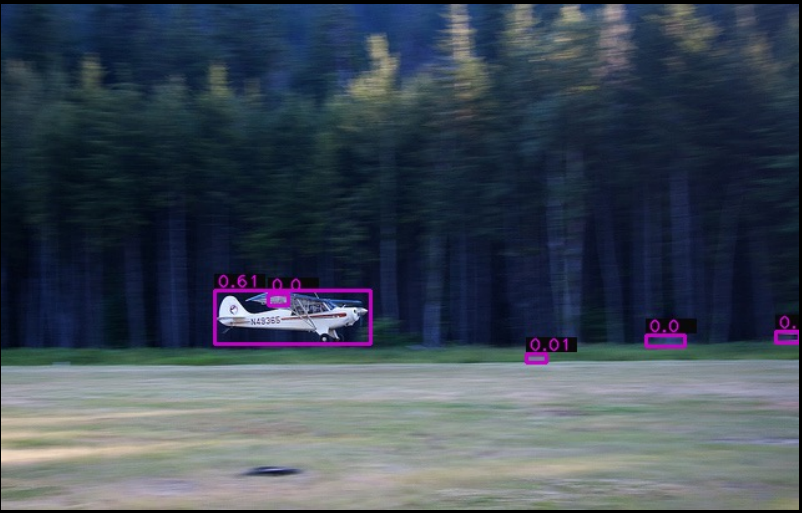

Is the plane landing?

*No: 2 votes*  
*(Yes: 8 votes)*

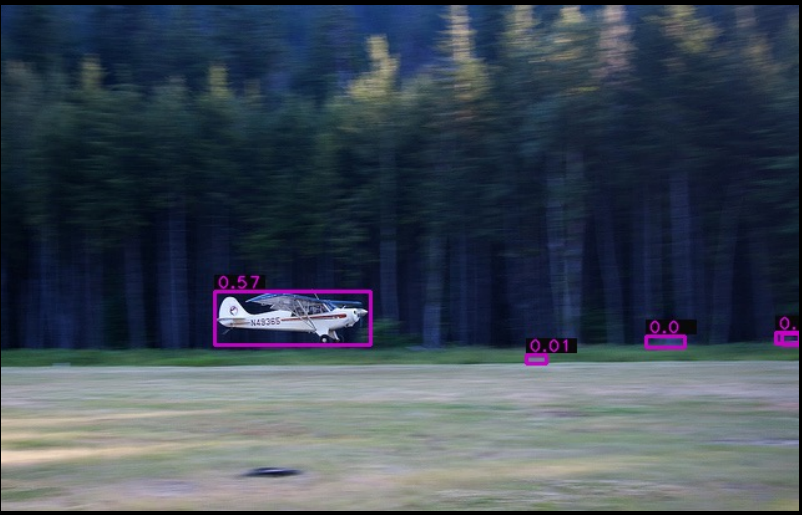

How many birds are here?

*0*

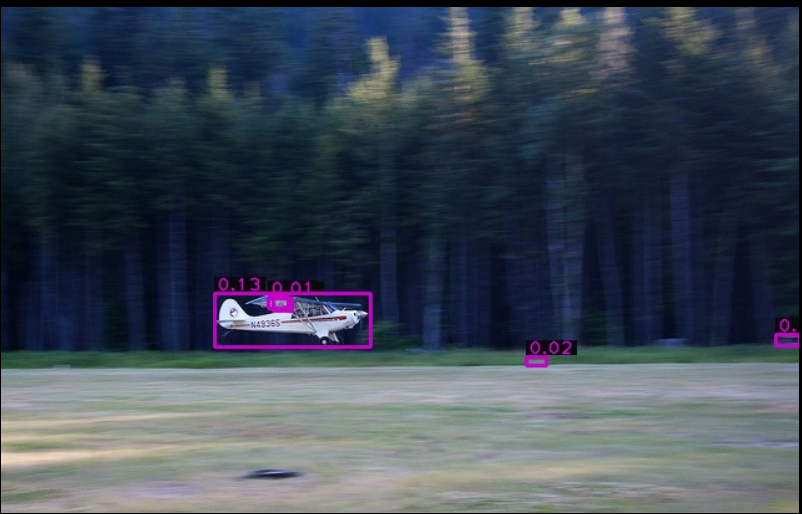

What color is the plane?

*White and brown*  
*(White and red)*

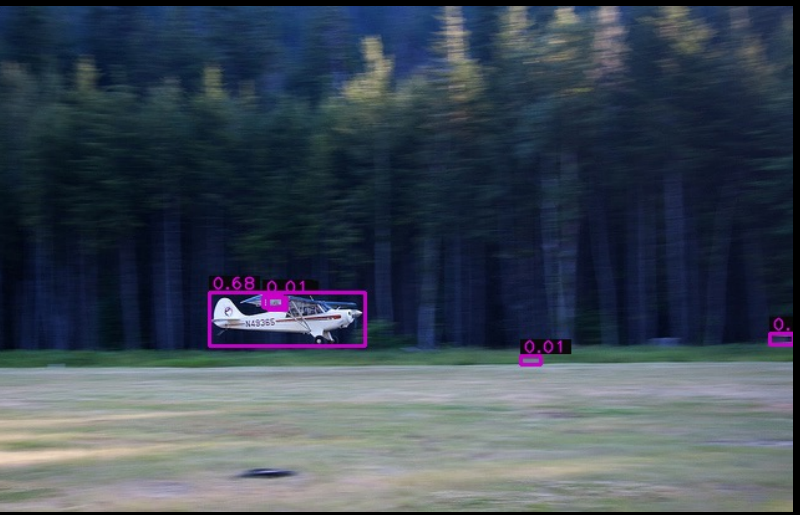

Generate a caption for this image.

*A plane flying over a field of grass.*

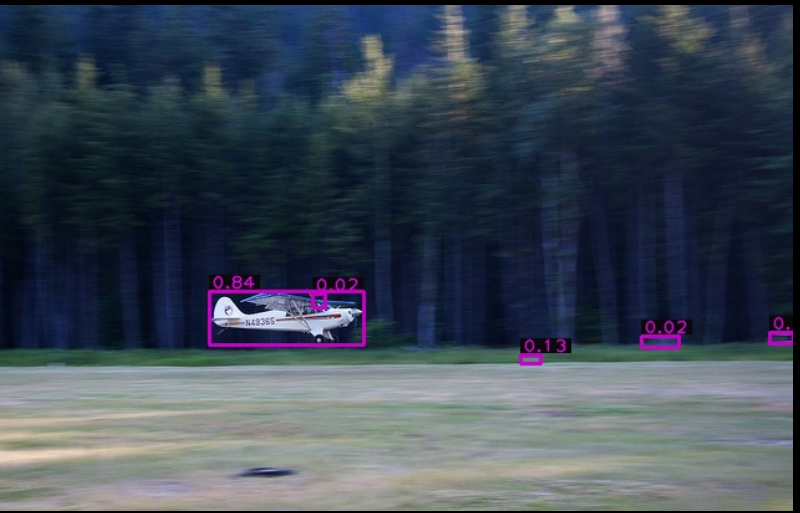

Generate a description for this image.

*A small plane flying over a field of grass.*

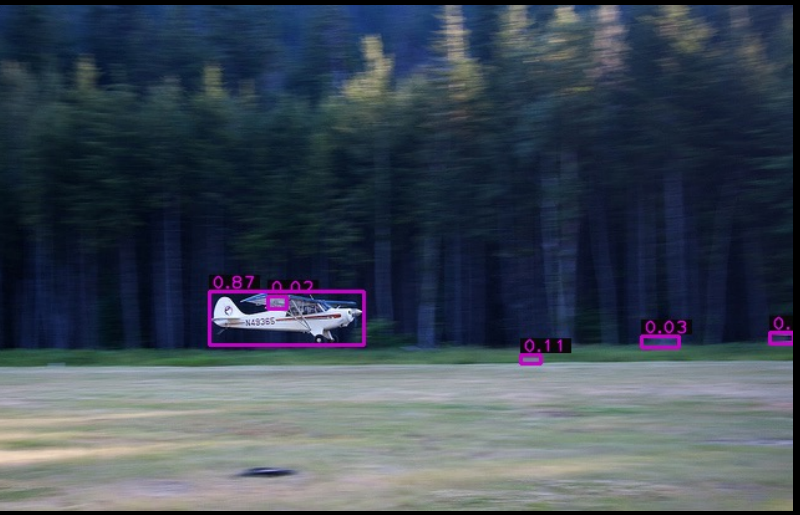

What is going on in this image.

*A plane flying over a city with a sky background*  
*(A single engine plane flying low over a field.)*

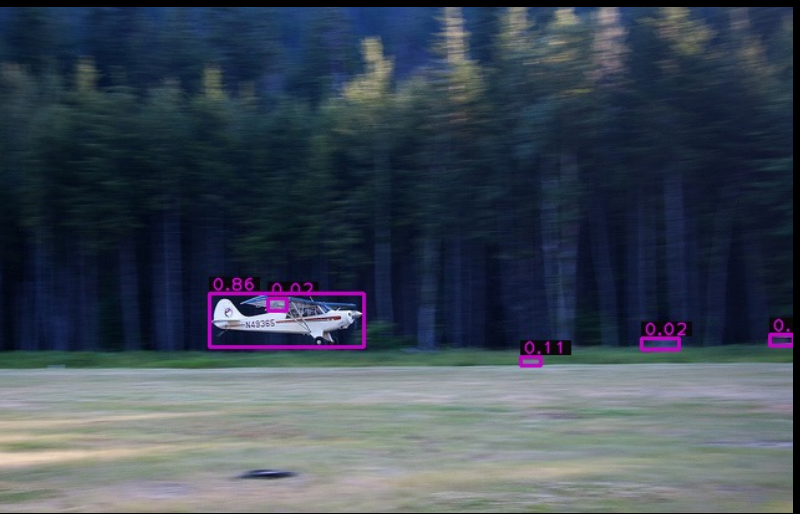



Locate all instances  
of airplane in the  
image.

*1 plane*

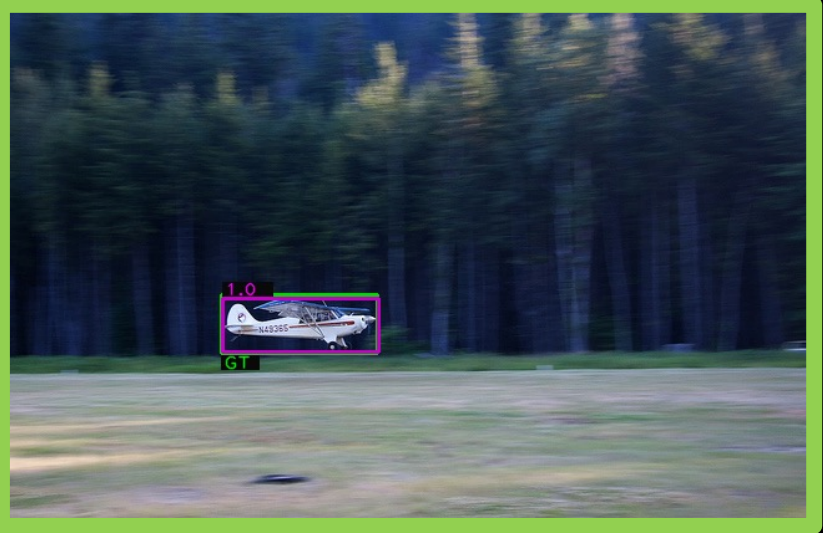

What is this thing?

*Airplane*

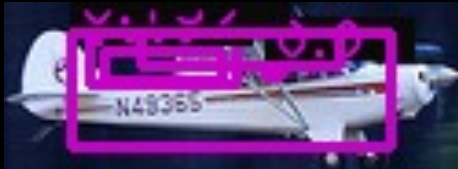

Is she tired?

Yes

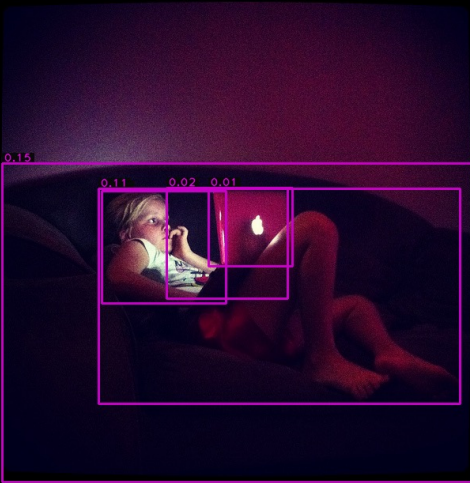

Locate all instances of couch in the image.

*A man laying down on a couch*

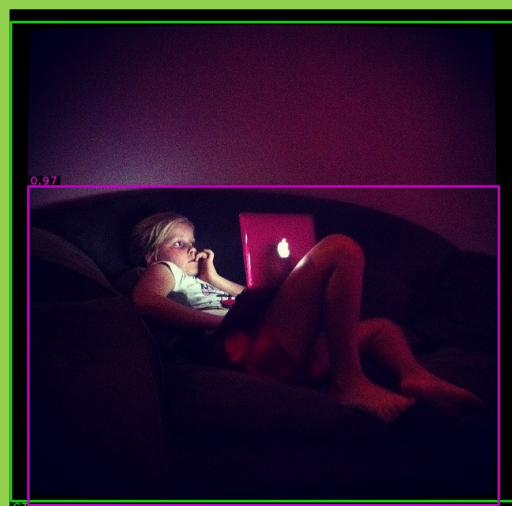

Who is using the laptop?

Woman  
(Girl)

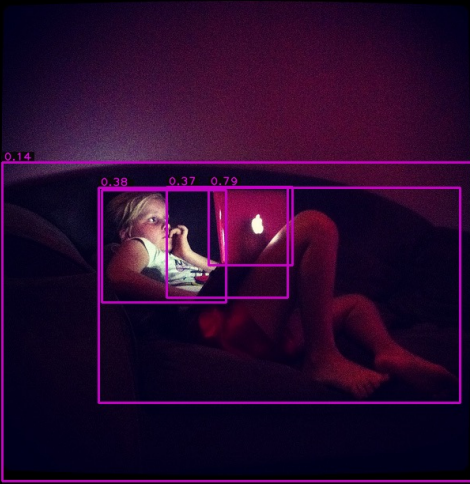

Find person in this image.

*A woman laying on a couch with a laptop*

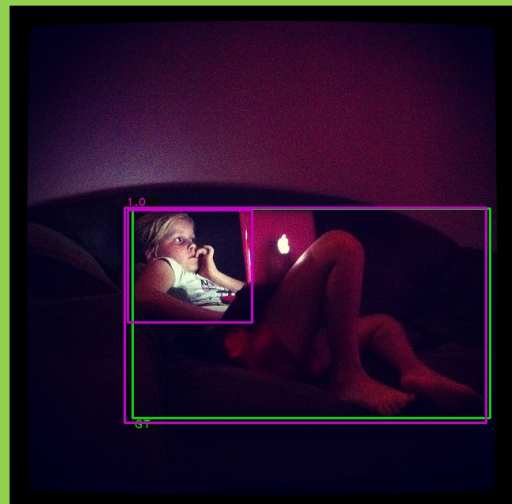

Is there a laptop in the photo?

Yes

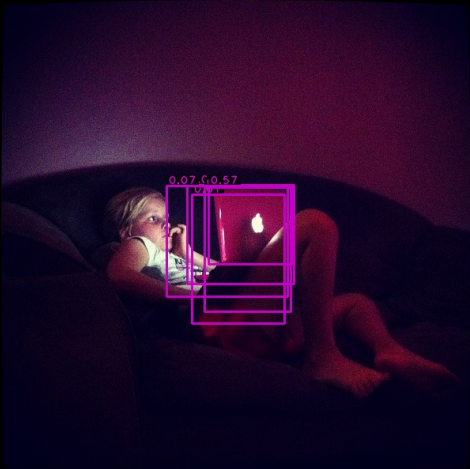

Find all instances of laptop in the image.

*Apple*

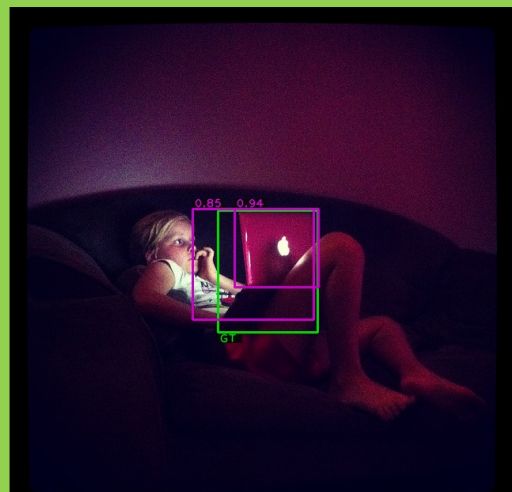

Generate a caption for this image.

*A woman laying in bed while looking at a laptop.*  
*(A little girl sits on a couch while using a laptop)*

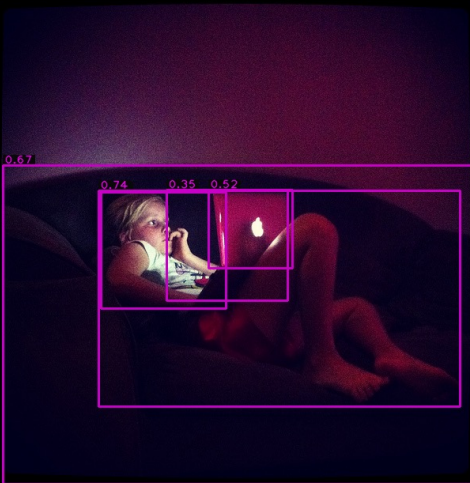

What object is this?

*Bed*  
*(Couch)*

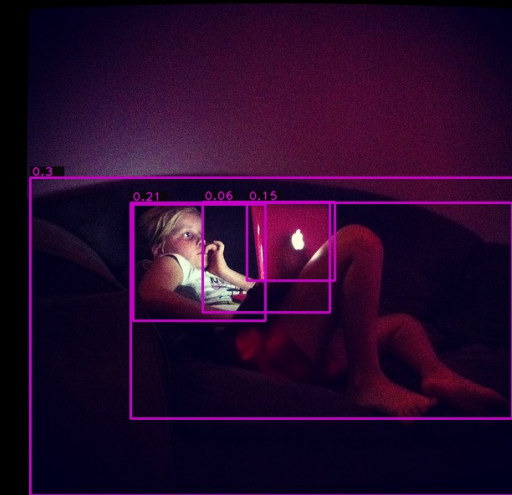



What object is this?

*Person*

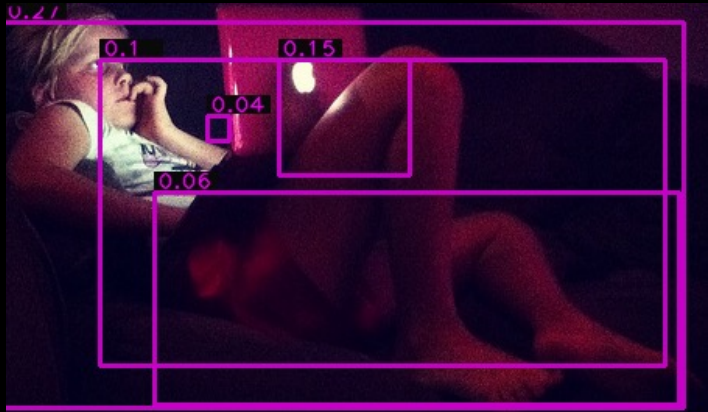

What is this thing?

*Laptop*

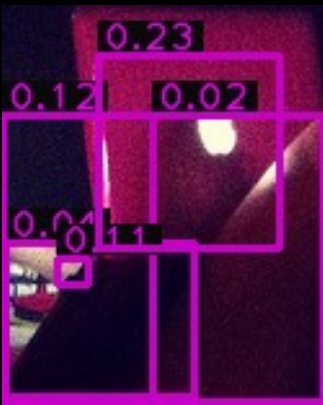

Compared to the mountains, is the plane lower or higher?

*Below*  
*(Higher)*

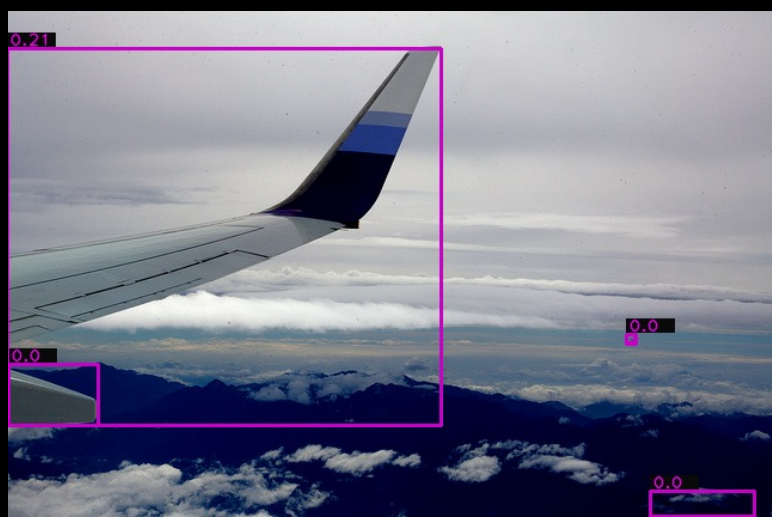

What is happening in the image.

*A plane flying over a mountain range.*

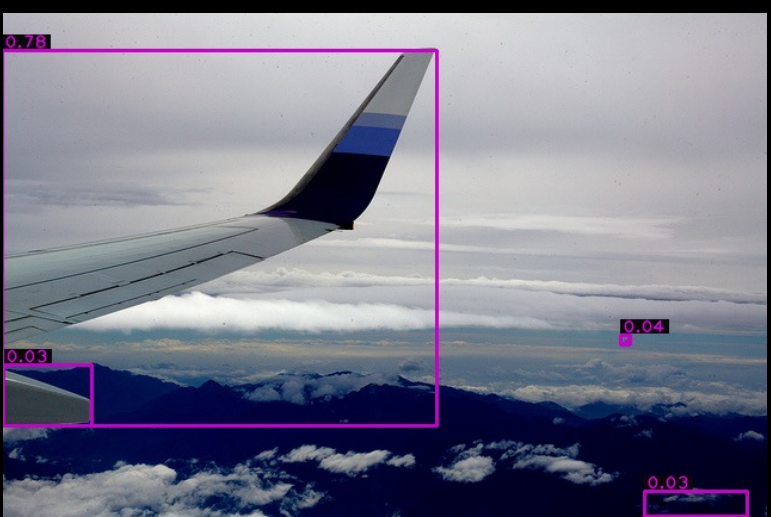

Is this plane in the sky?

*Yes*

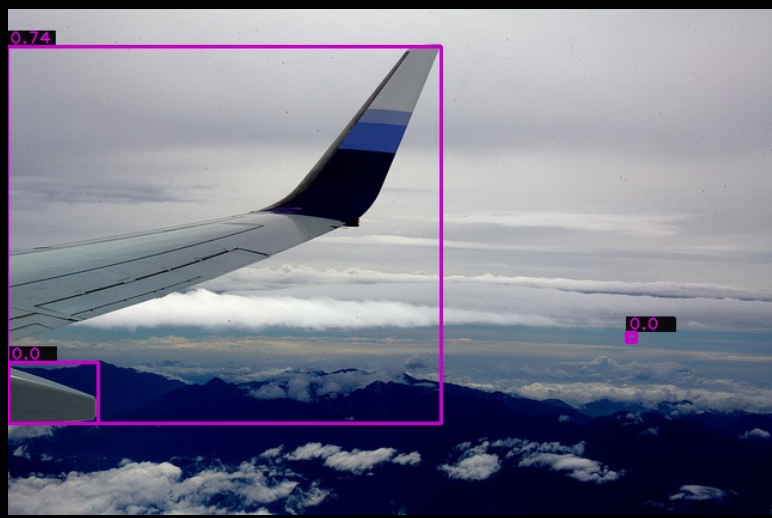

Find instances of airplane.

*Airplane*

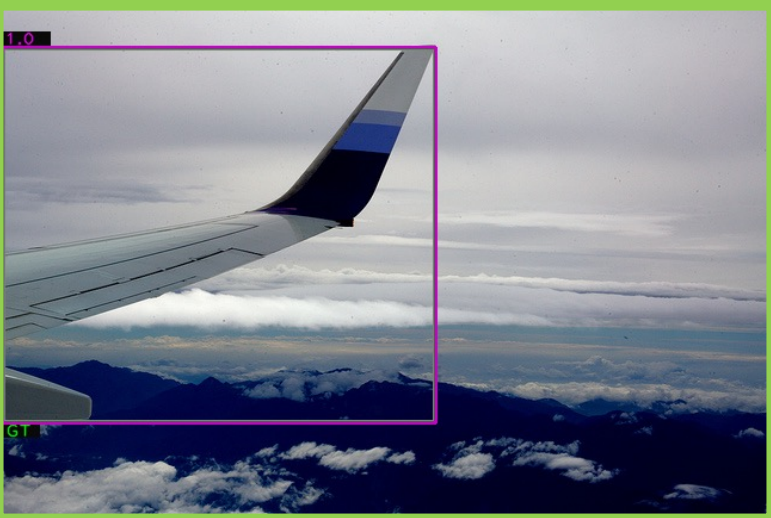

Do planes travel through the earth's atmosphere?

*Yes*

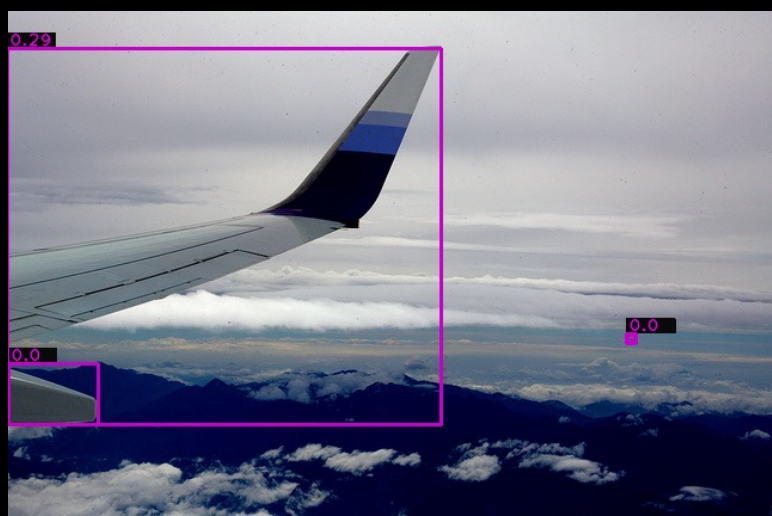

What is this thing?

*Airplane*

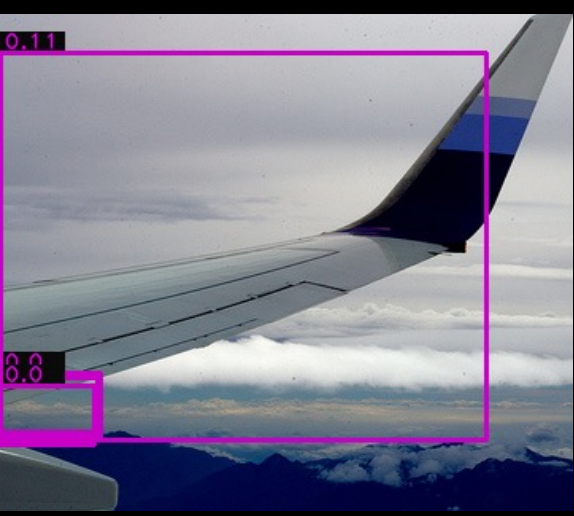

Generate a description for this image.

*A view of a plane wing from the ground.*  
*(A wing of an air plane flying in the air)*

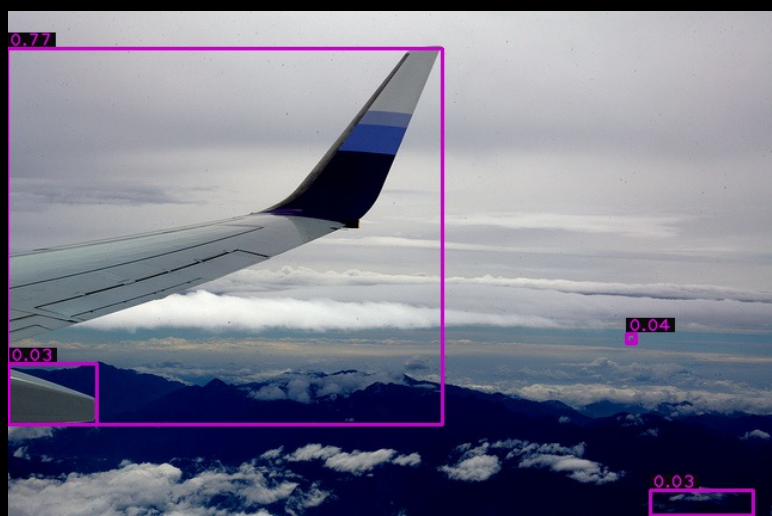



Are these cars older models?

No

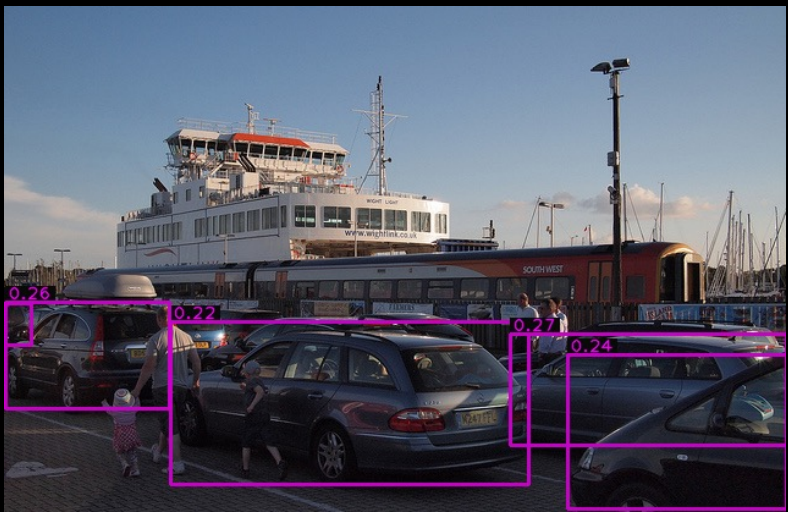

What event is the car going too?

Takeoff  
(Cruise)

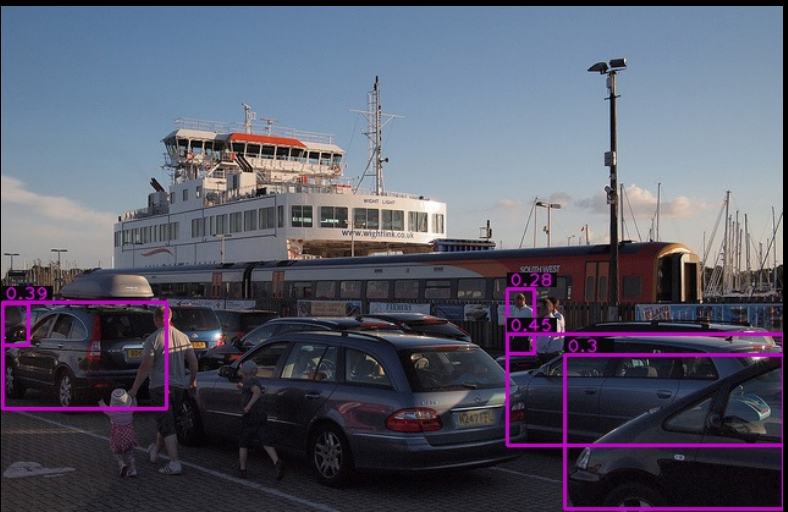

What color is the van?

Blue: 2 votes  
(Gray: 3 votes)

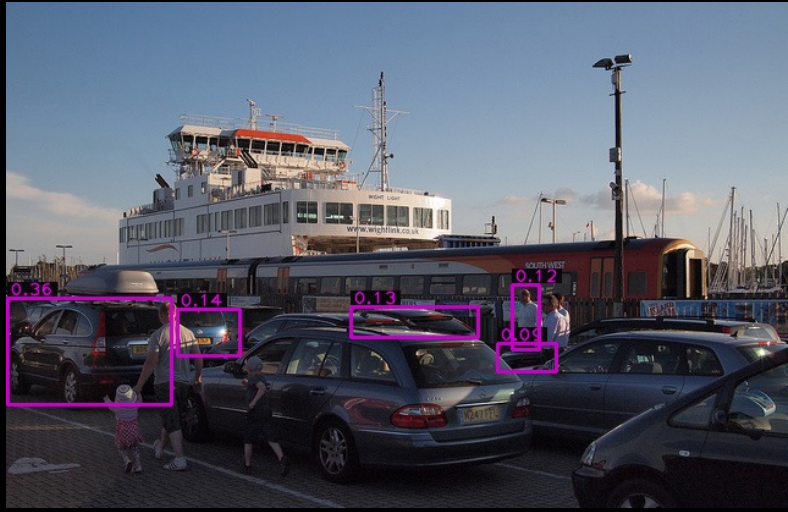

Is this a busy street?

Yes

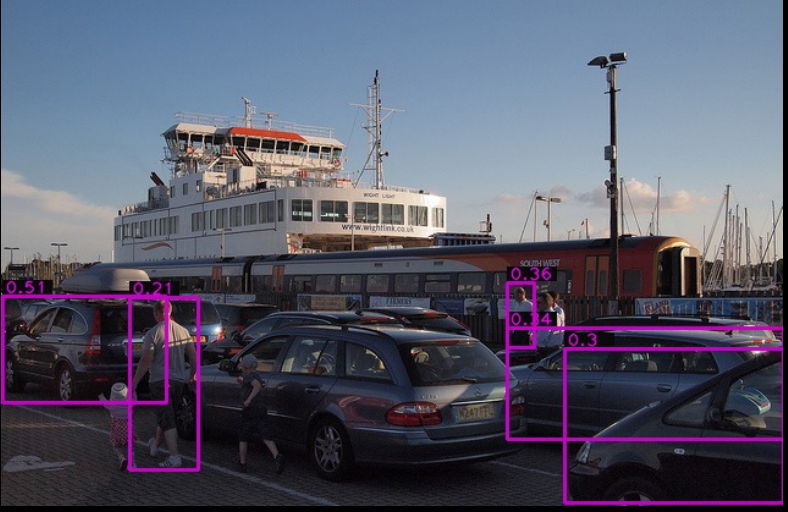

Is there a car on the boat?

No

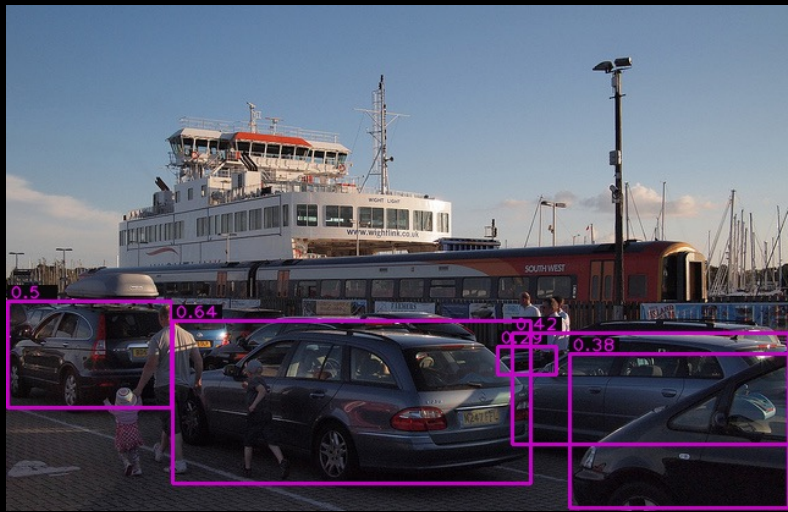

How many cars are in this scene?

6  
(11)

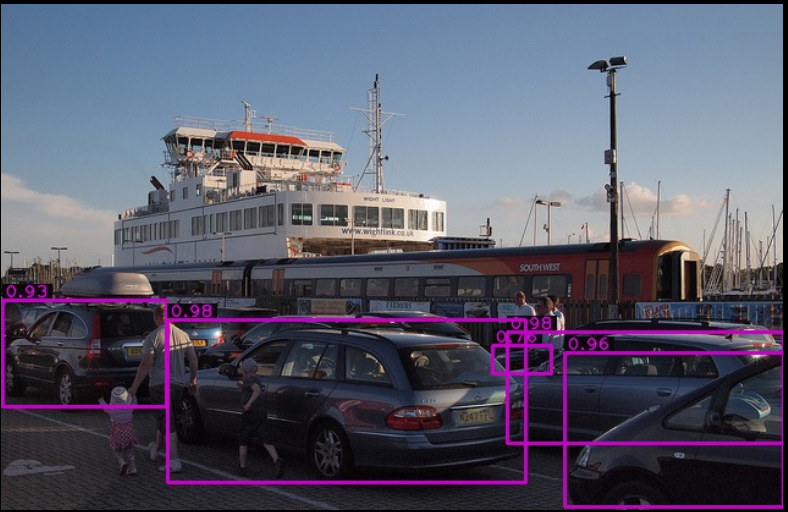

Is there water here?

No

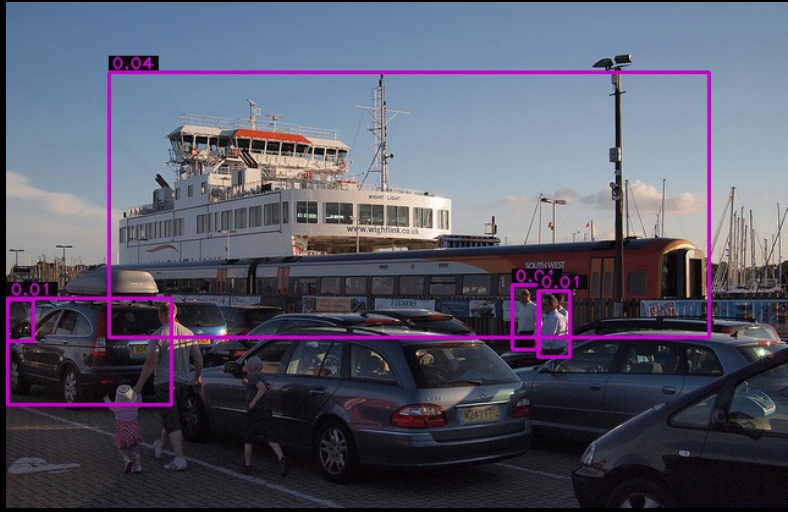

What car brand is in the photo?

Toyota

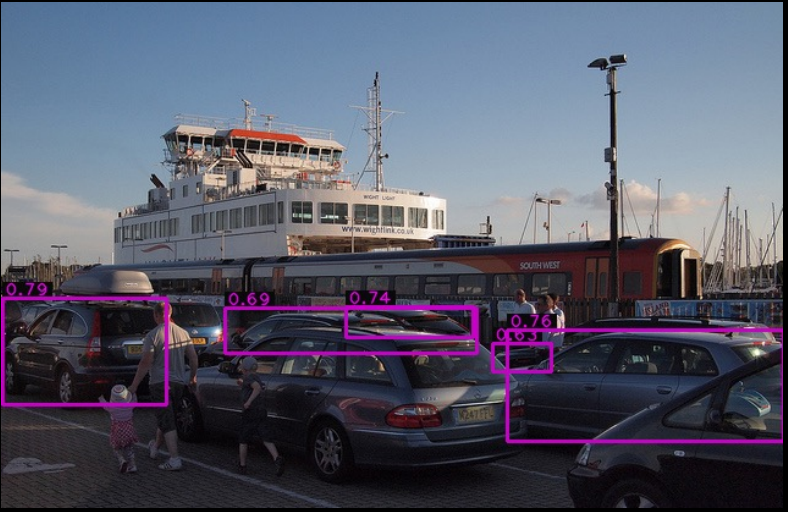



What type of boat is this?

Ferry

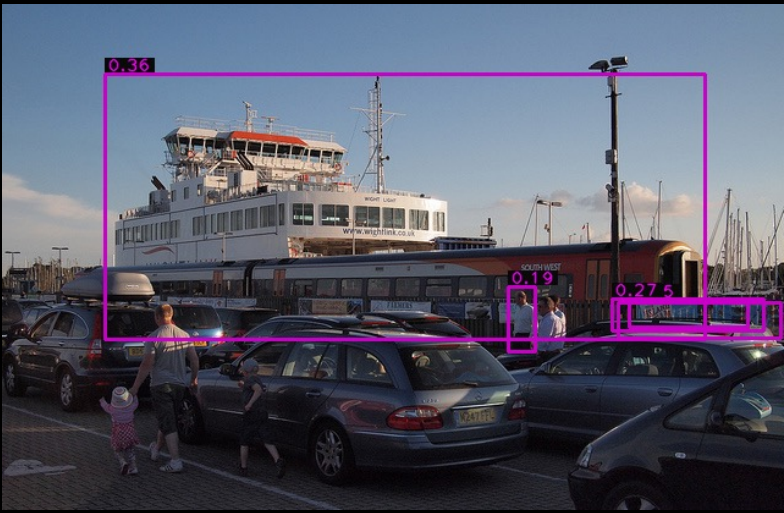

What kind of vehicles are these?

Boats  
(Cars, train and boat)

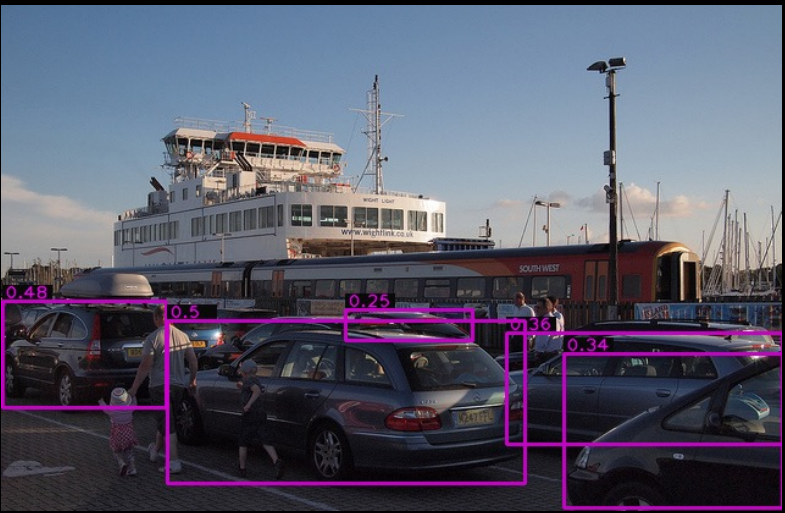

Is there a body of water in this picture?

No

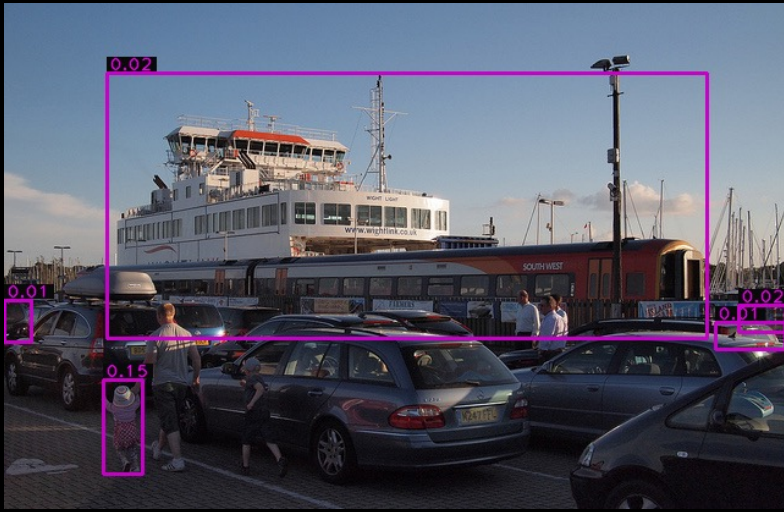

Is the owner of this car a couch potato?

No

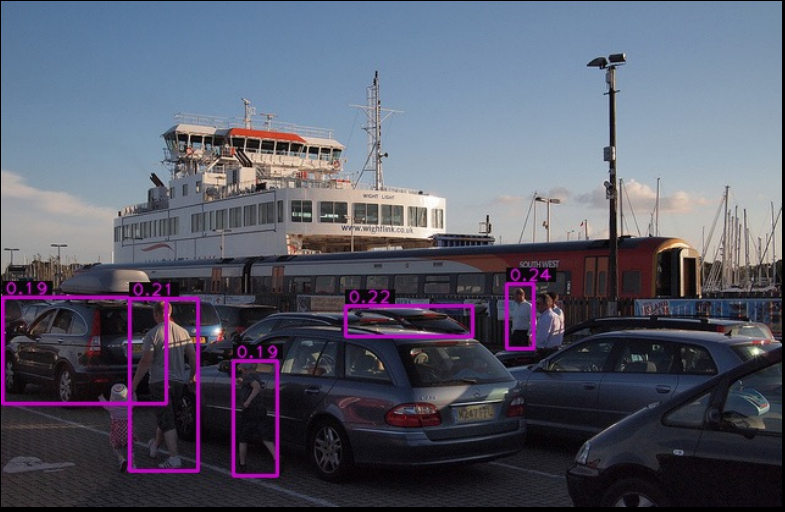

Are clean windshields important today?

Yes

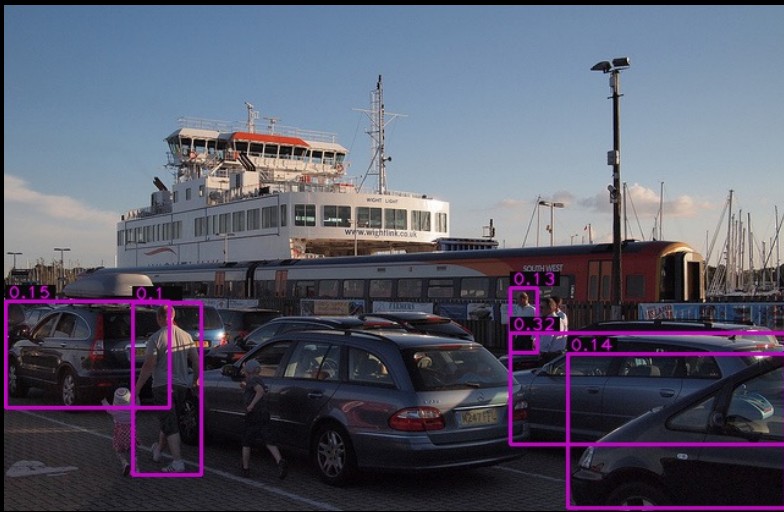

Where are the kids riding?

Parking lot  
(Car)

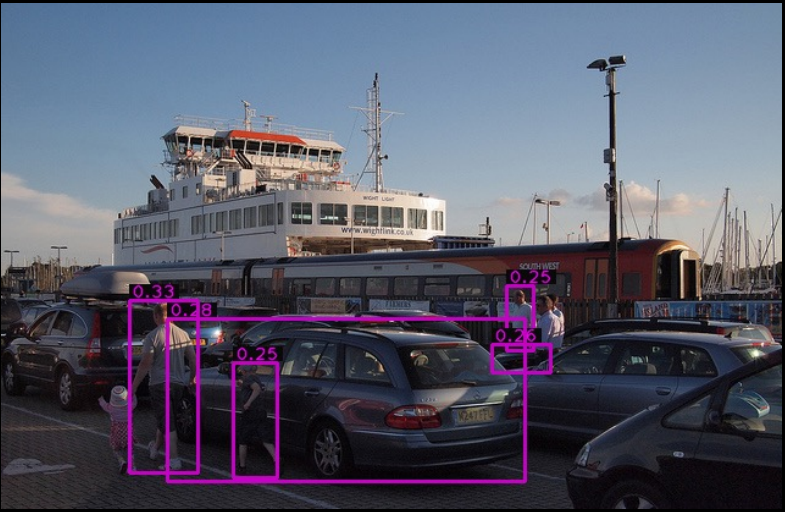

Would you rather walk or take the bus here?

Wait  
(Walk)

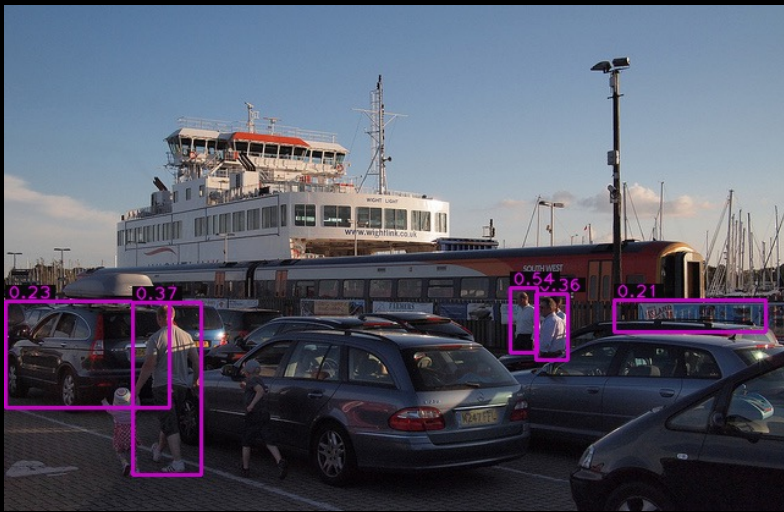

Are the cars moving?

No

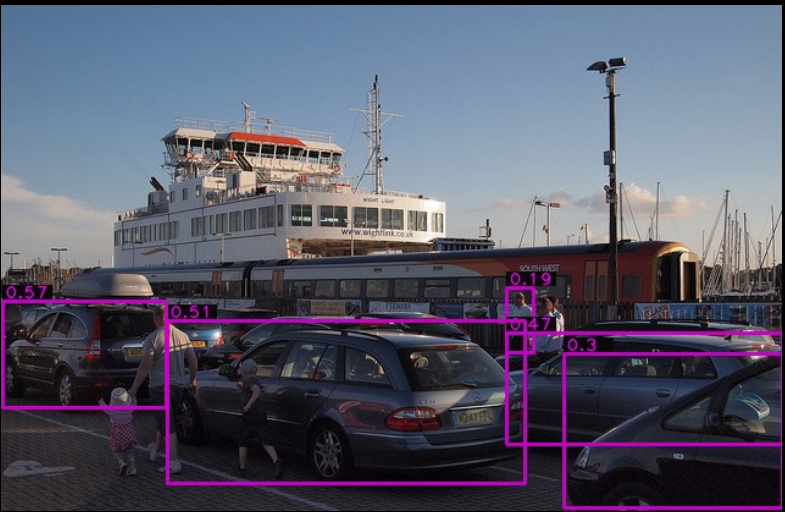



What kind of car is parked?

**Sedan**  
(Hatchback, wagon, sedan)

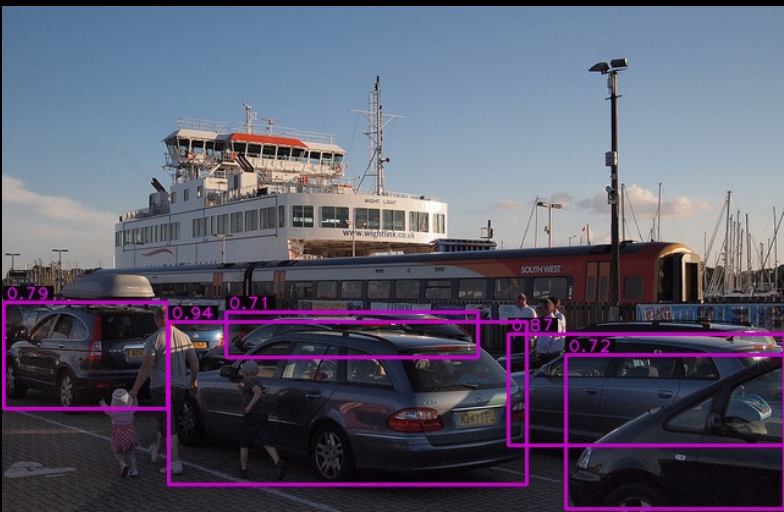

How many children are there?

**3**  
(2)

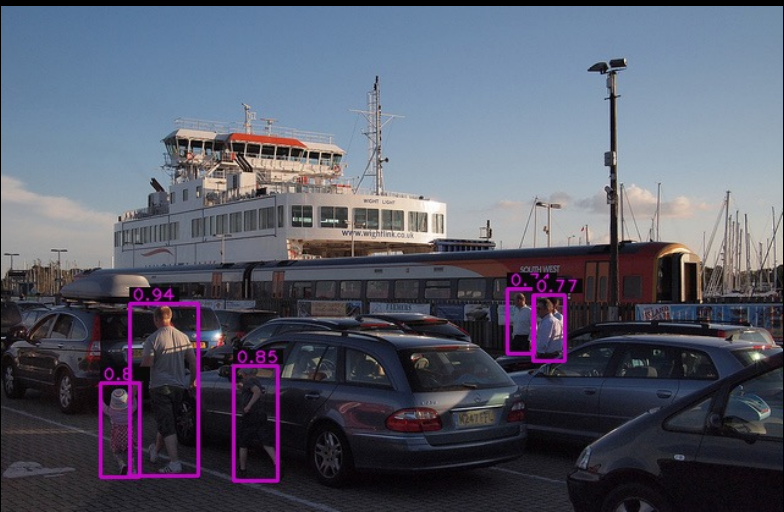

Is a train going over the traffic?

**No**

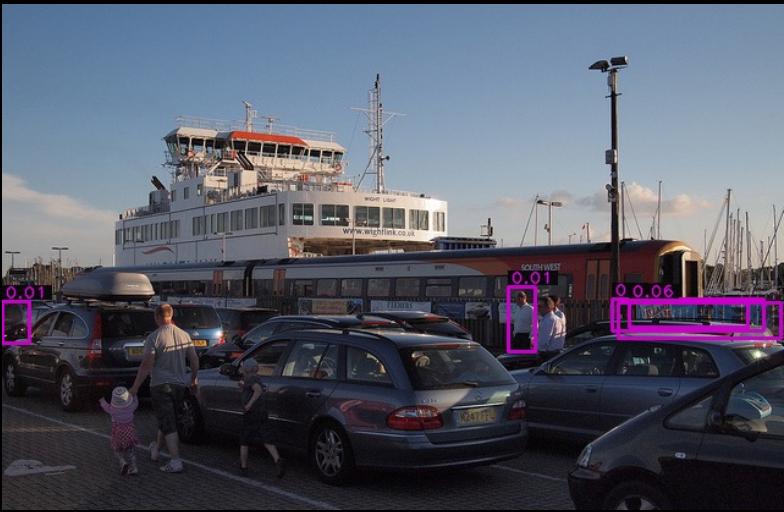

What type of vehicle is shown?

**Boat: 1 vote**  
(Car: 4 votes)

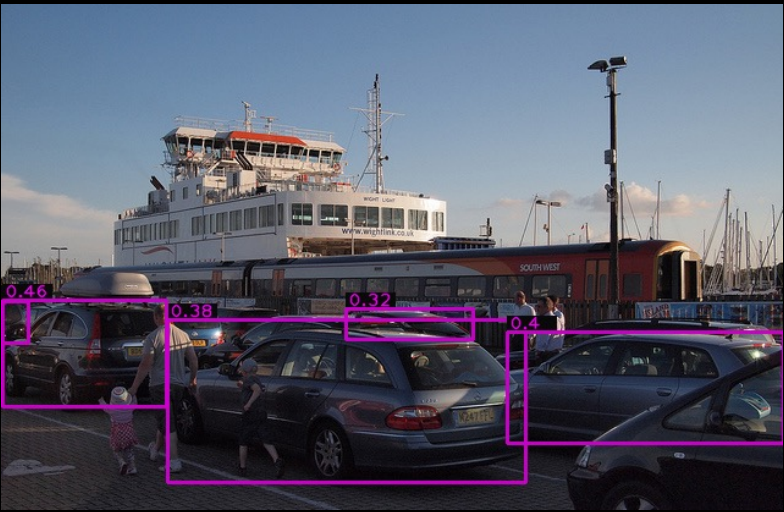

Is anyone holding an umbrella?

**No**

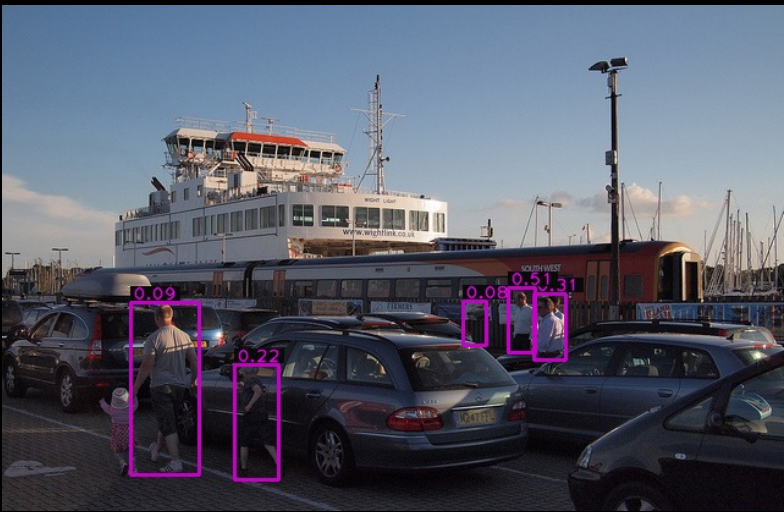

Is this a real train?

**Yes**

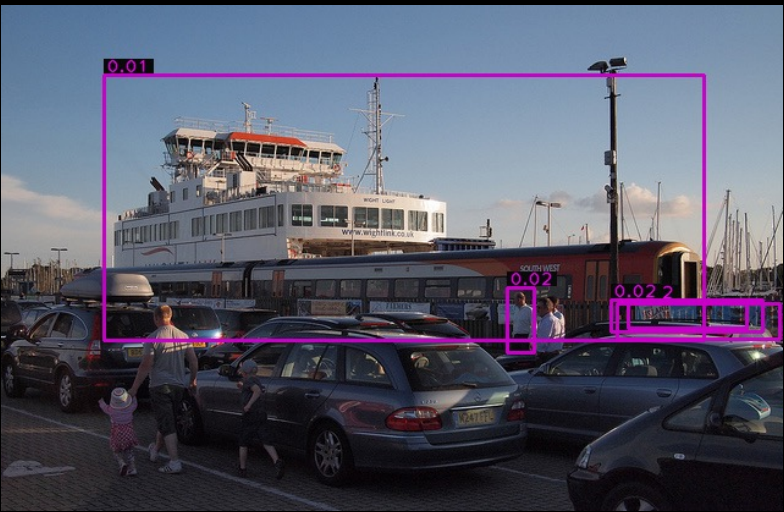

What type of transportation is this?

**Boat**

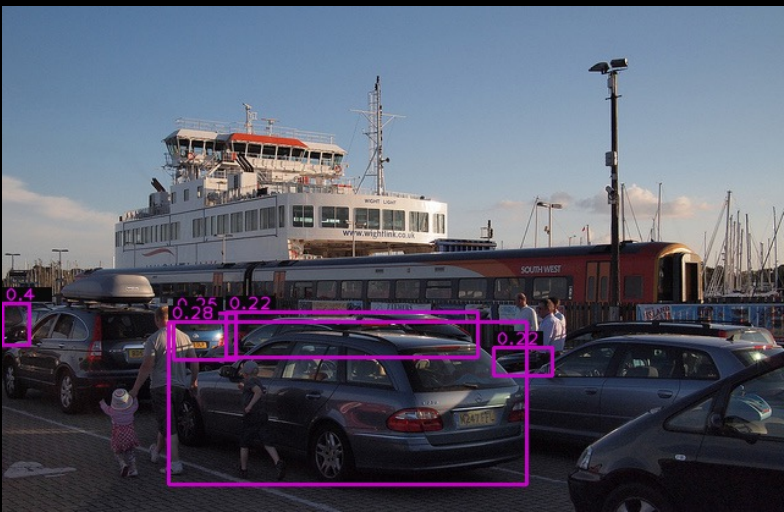

What is on the roof of the SUV?

**Boat: 1 vote**  
(Luggage: 2 votes)

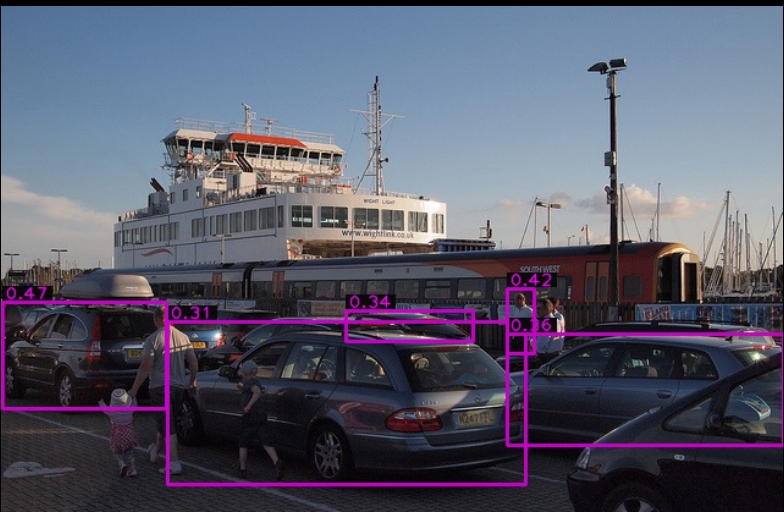



Who is wearing an all pink outfit?

Woman  
(Girl)

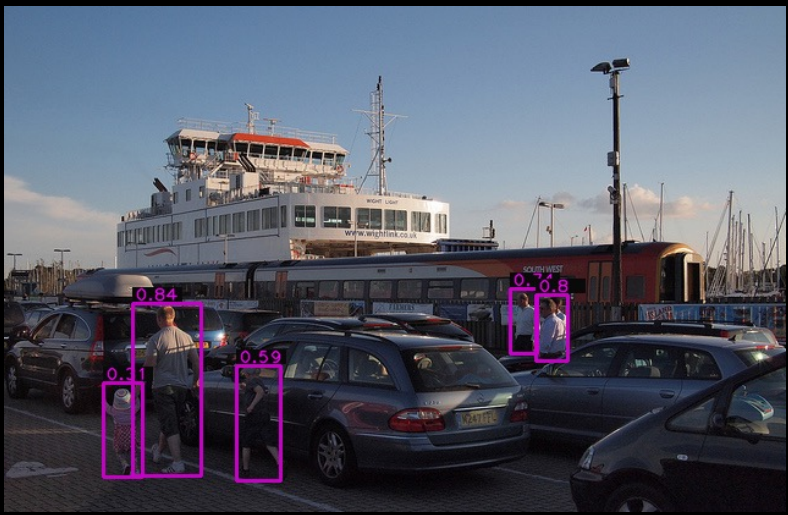

How many people are here?

6

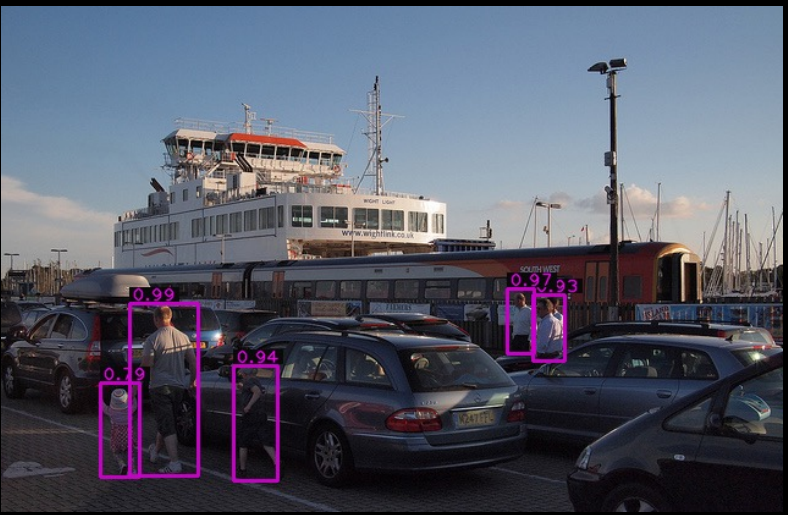

What is in the background of this picture?

Boat

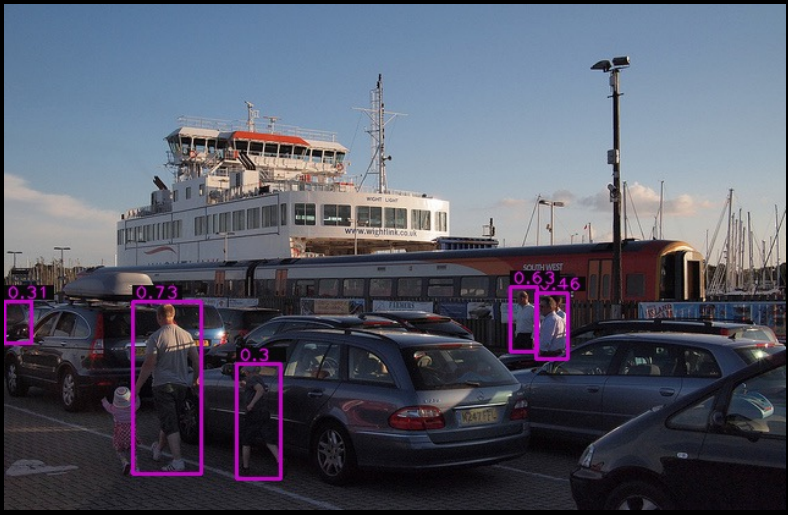

Is the picture in color?

Yes

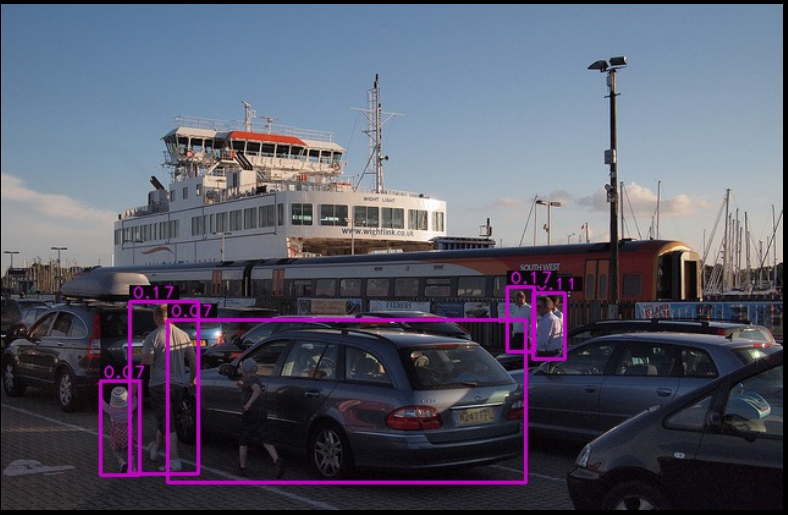

Are they at an intersection?

No

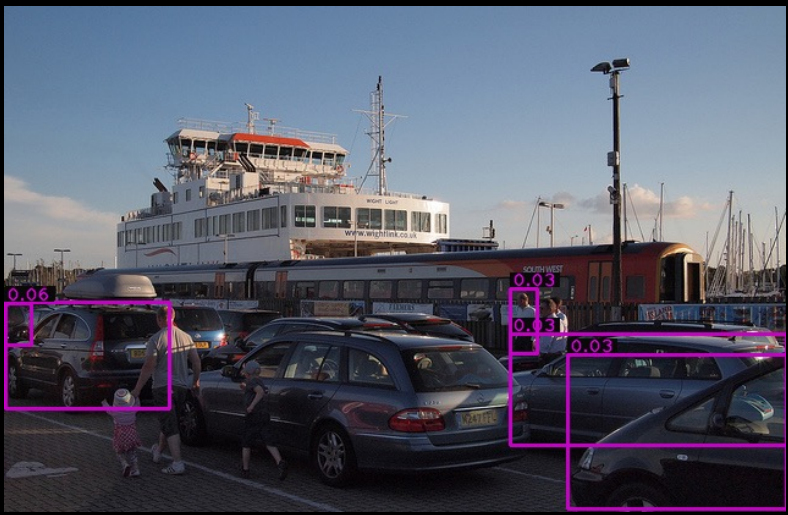

How many different types of transportation?

4: 1 vote  
(2: 5 votes)

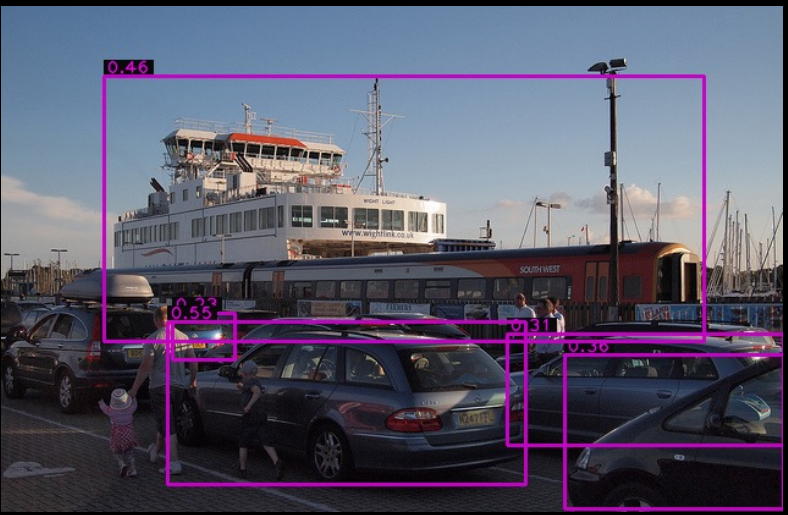

Could this be a house of worship?

No

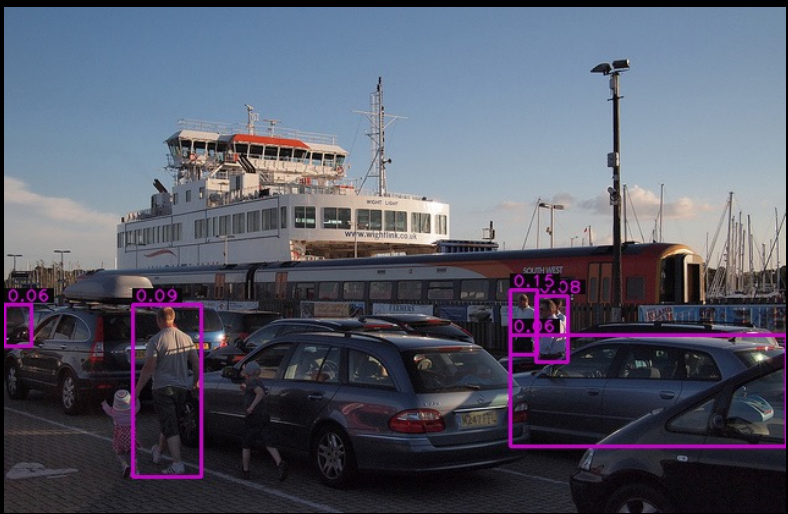

What type of vehicle is this?

Boat

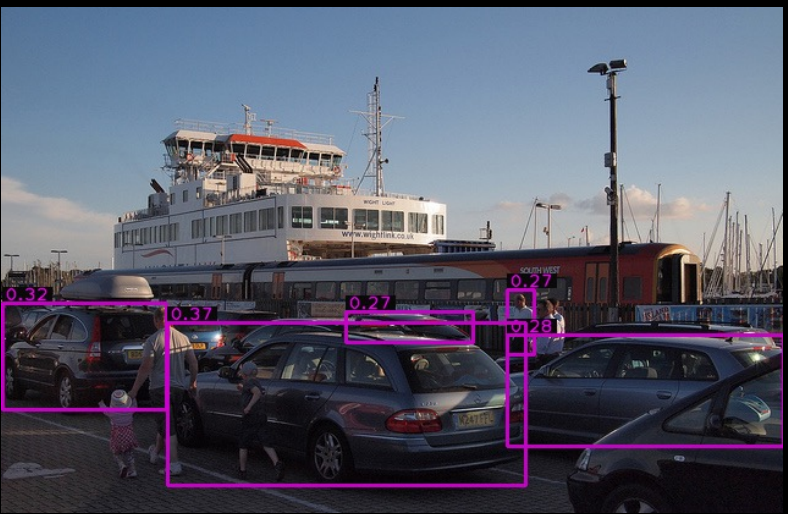



How many vehicles  
are in the picture?

8

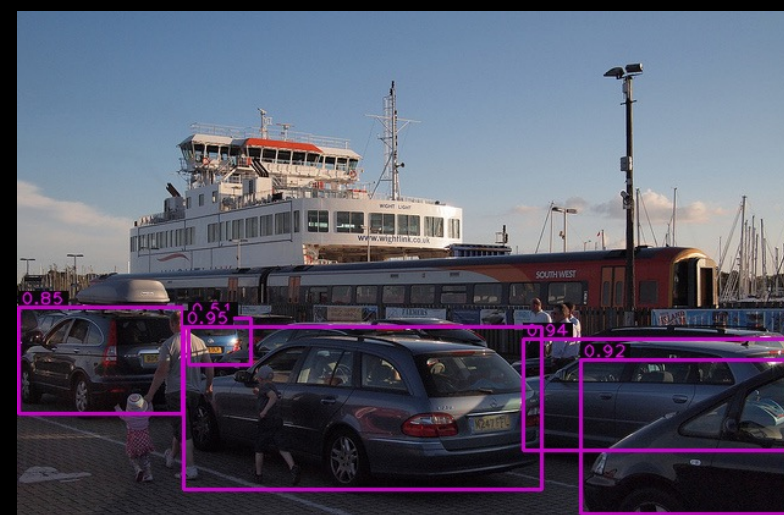

# Find person.

*People are walking on  
the sidewalk near cars  
and trains.*

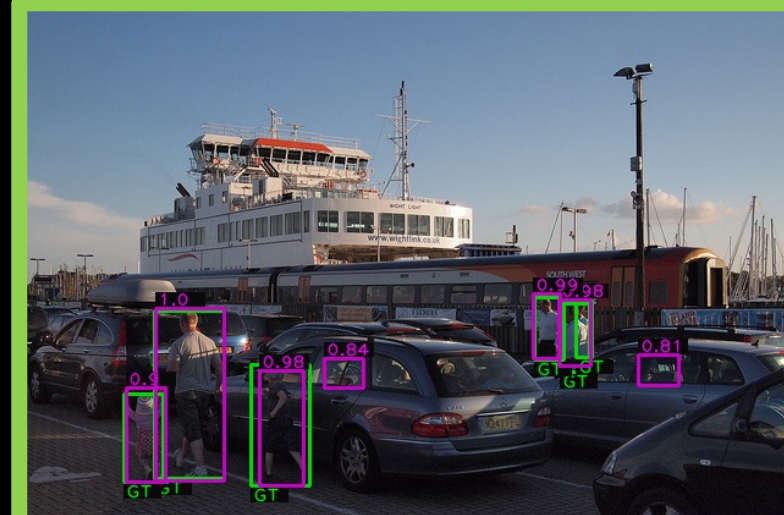

# What is in the background?

## Boat

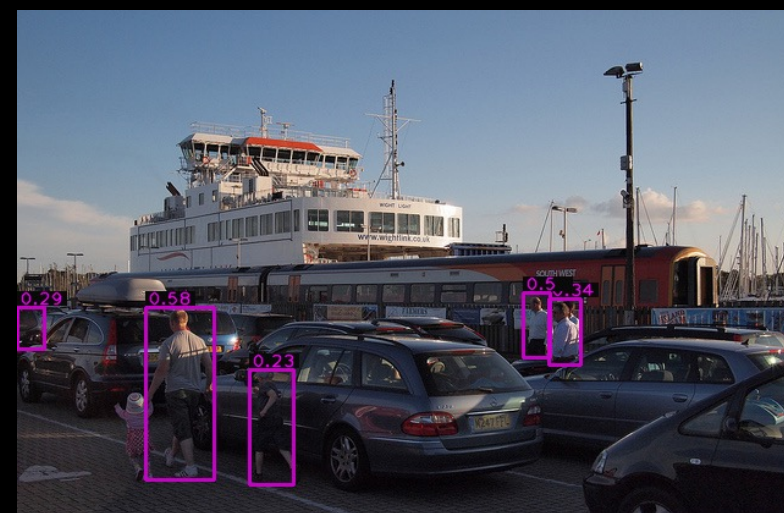

Find boat in the image.

# Ferry

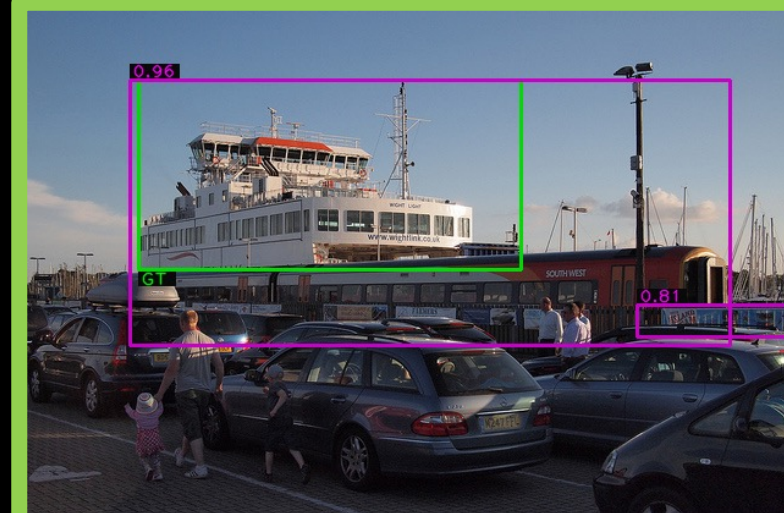

Generate a caption.

A large boat is parked  
on the side of a road.

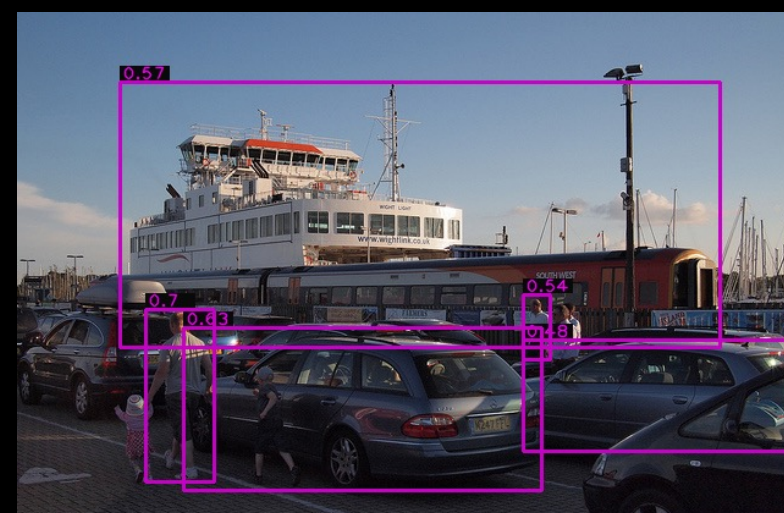

Locate all instances  
of train in the image.

1 \_\_unk\_\_

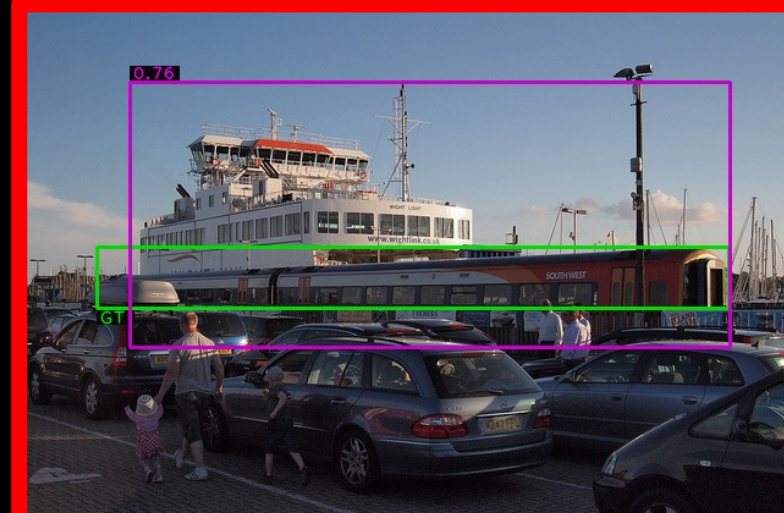

Locate car in this image.

unk

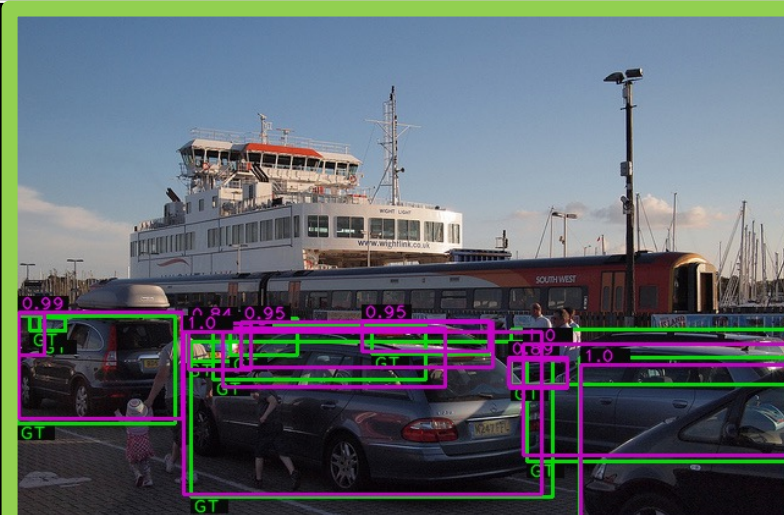

# What is this thing?

*Car*

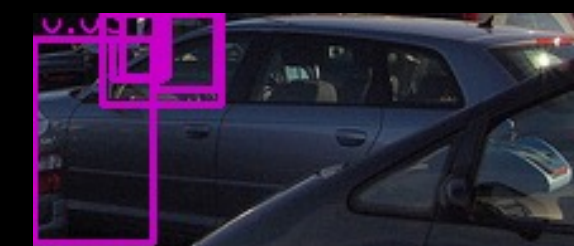

What is this?

*Person*

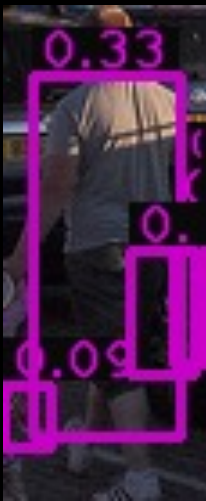

What is this thing?

*Boat*

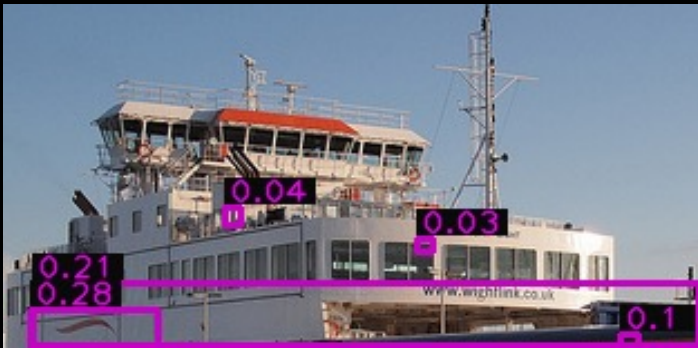

What is this thing?

*Train*

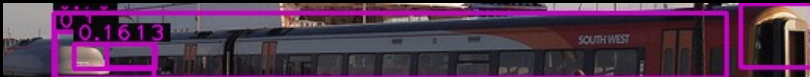



What is the man catching?

*Frisbee*

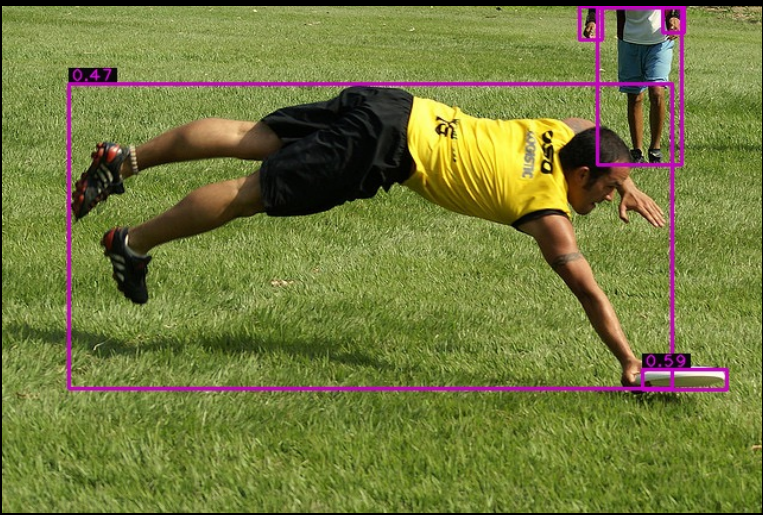

Generate a description for this image.

*A man dives to catch a frisbee in a grassy field.*

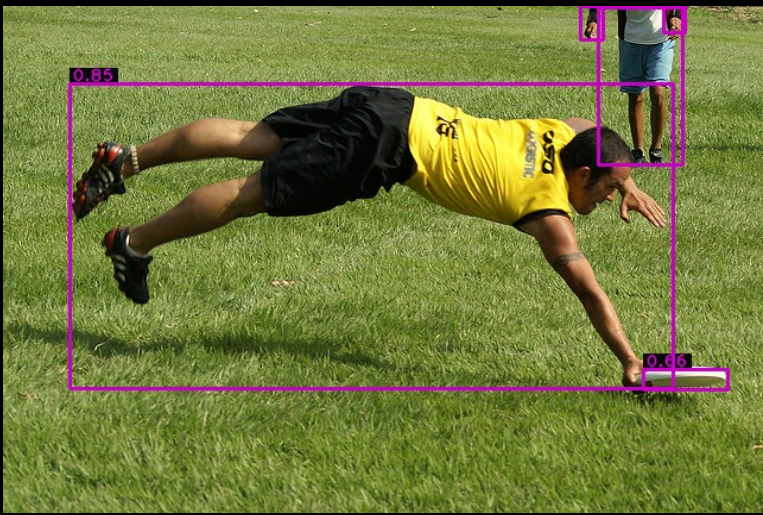

Which man has the Frisbee?

*Right*  
*(Yellow shirt)*

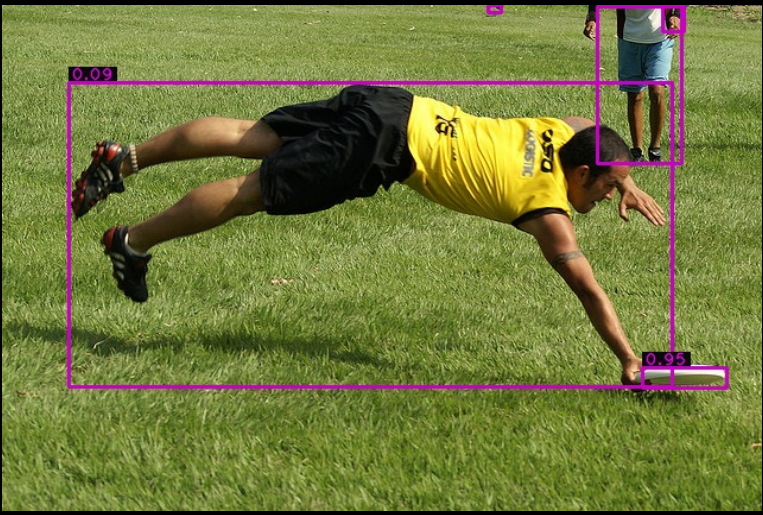

Locate all instances of person in the image.

*Woman*

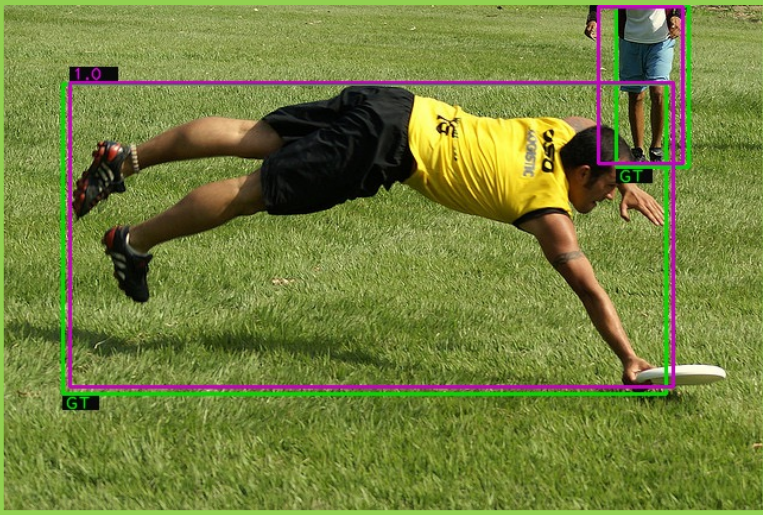

Will the man hit the ground?

*No*  
*(Yes)*

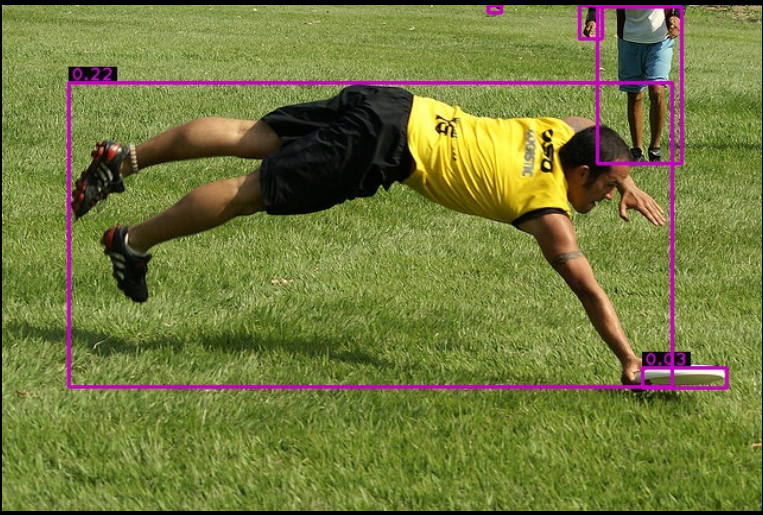

Find all instances of frisbee in this image.

*1*

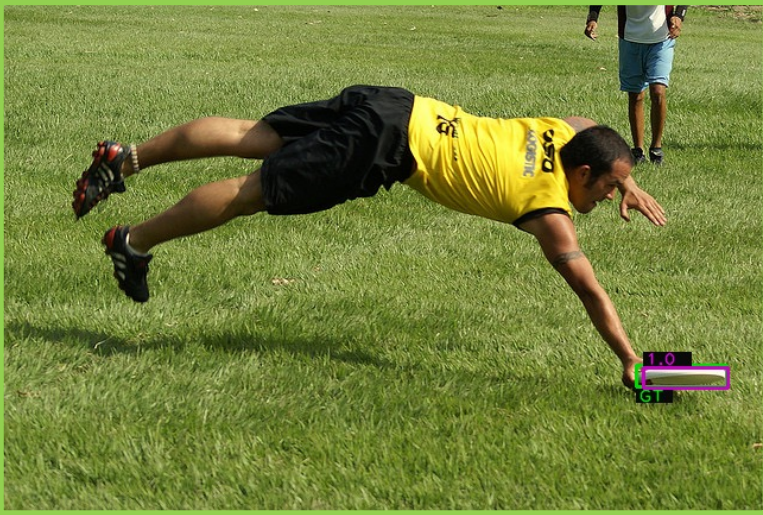

What sport is being played?

*Frisbee*

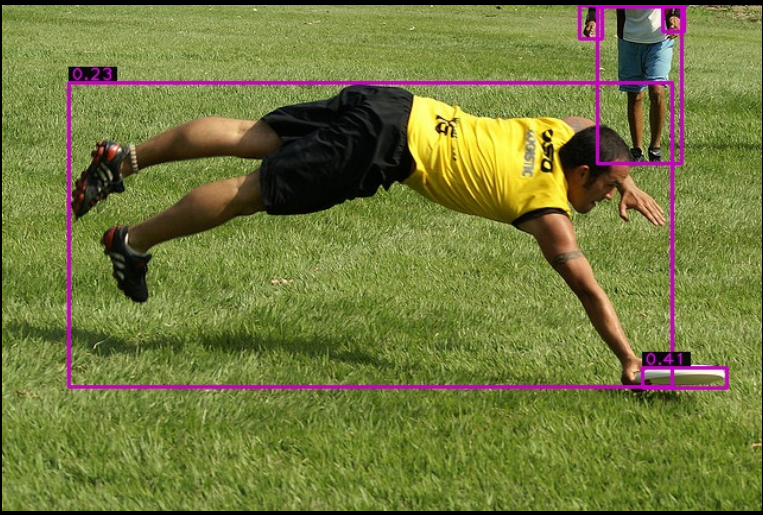

What is this?

*Person*

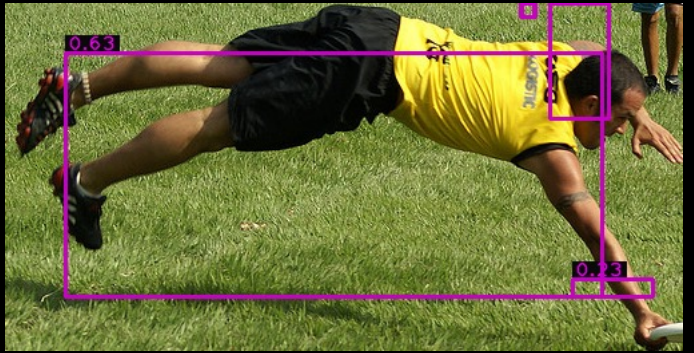



What object is this?

*Frisbee*

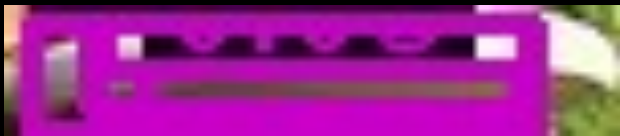

Is this a good place  
to sleep?

Yes

(No)

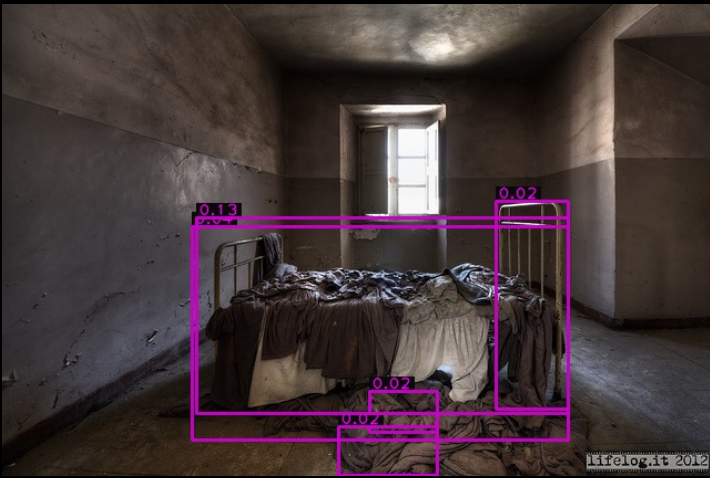

What is on top of  
this ugly bed?

Bunk

(Sheets)

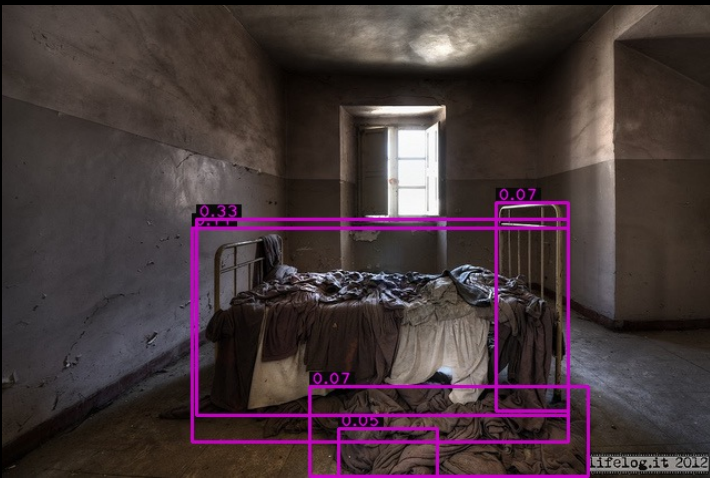

What is the  
headboard made of?

Wood

(Metal)

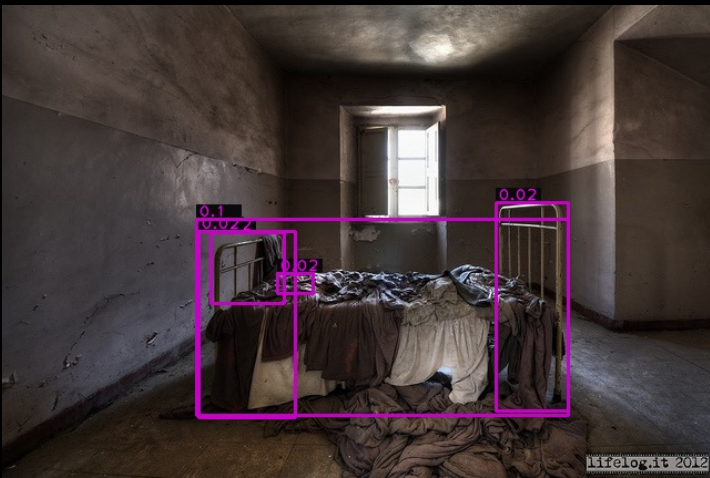

Generate a caption  
for this image.

A bed with a tarp and  
a tarp on it.

(A bed covered in  
heaps of rags and dirty  
bedding)

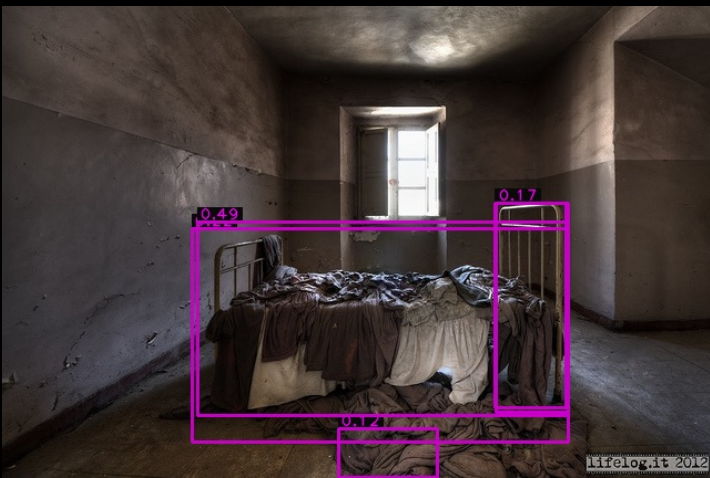

Describe this image.

A bed and a small  
truck in a room.

(There is a very large  
room with only a bed  
in it)

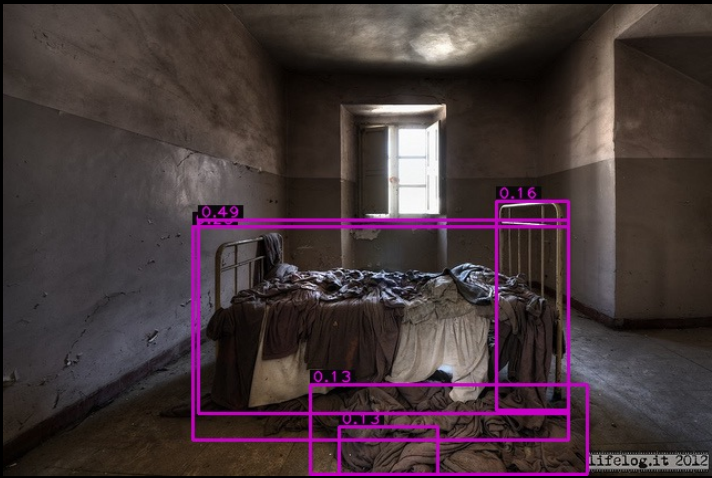

Locate instances of  
bed in this image.

A bed room with a  
bed and a bed

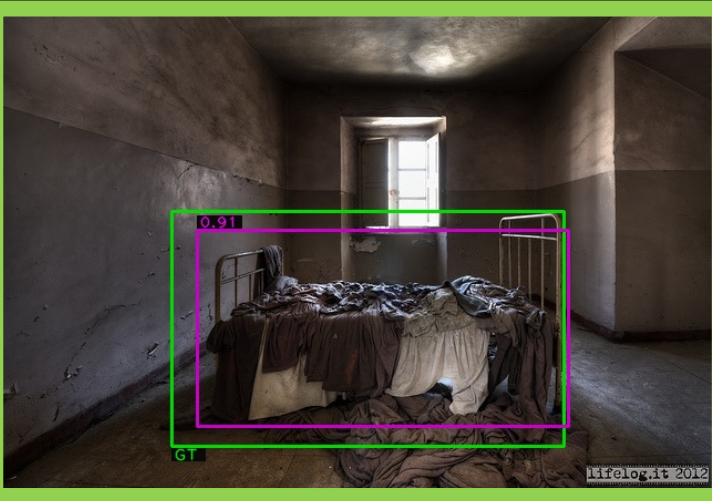

What is this object?

Bed

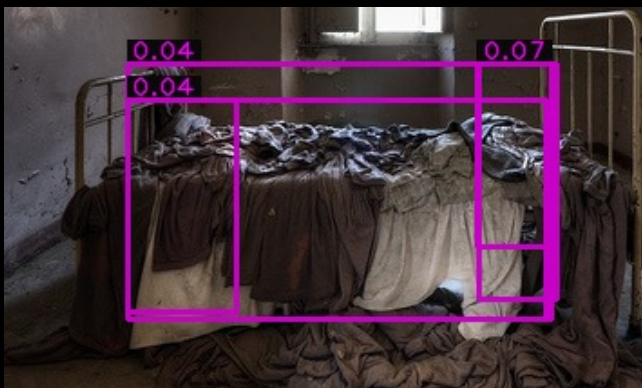

Supplement: Supplementary file 2 [file Gupta_Towards_General_Purpose_CVPR_2022_supplemental.zip]
